# Supplementary material for: Sustained Drug Treatment Alters the Gut Microbiota in Rheumatoid Arthritis
Source: Front Immunol. 2021 Oct 14;12:704089. doi: 10.3389/fimmu.2021.704089 (PMC8551364; doi:10.3389/fimmu.2021.704089)
Supplement: Supplementary file 1 [file DataSheet_1.xlsx]

## Sheet: Table S1
Table S1 Detail information of all participants.
Sample name	Individual ID	Time point	Treatment	Gender	Age	Height	Weight	BMI	Duration	WBC	HB	PLT	ALT	AST	BUN	CR	ESR	CRP	RF	Anti-CCP	JTS	JSS	MS	RPJ	VAS.D	VAS.P	HAQ	DAS28.CRP
C01	C01	HC	HC	F	52	155	45	18.73	-	6.8	133	290	22	24	5.64	78	2	2.83	8	0.7	-	-	-	-	-	-	-	-
C02	C02	HC	HC	F	59	154	40	16.87	-	5.78	123	290	11	24	5.14	65	12	0	0	0.5	-	-	-	-	-	-	-	-
C03	C03	HC	HC	F	51	160	56	21.88	-	7.11	140	237	1	26	5	67	22	2.2	8	0.5	-	-	-	-	-	-	-	-
C04	C04	HC	HC	F	24	162	50	19.05	-	4.02	126	265	12	17	4.8	68	17	0	9	0.9	-	-	-	-	-	-	-	-
C05	C05	HC	HC	F	49	160	55	21.48	-	5.67	108	304	10	14	4.16	61	29	2.45	9	0.5	-	-	-	-	-	-	-	-
C06	C06	HC	HC	F	24	159	50	19.78	-	6.75	123	365	10	13	2	57	29	0	5	0.5	-	-	-	-	-	-	-	-
C07	C07	HC	HC	M	56	175	65	21.22	-	5.55	92	201	11	13	4.4	53	13	0	14	0.5	-	-	-	-	-	-	-	-
C08	C08	HC	HC	M	51	165	60	22.04	-	6.7	152	193	93	45	5.3	117	7	2.1	9	0.5	-	-	-	-	-	-	-	-
C09	C09	HC	HC	F	39	-	-	-	-	-	-	-	-	-	-	-	-	-	-	-	-	-	-	-	-	-	-	-
C10	C10	HC	HC	F	45	158	45	18.03	-	4.62	116	179	14	20	4.7	61	30	0.9	8	0.5	-	-	-	-	-	-	-	-
C11	C11	HC	HC	F	37	160	52.5	20.51	-	4.92	141	232	16	17	4.4	61	38	0.3	12	0.5	-	-	-	-	-	-	-	-
C12	C12	HC	HC	F	46	155	51	21.23	-	8.9	116	287	17	18	3	45	11	0	6	0.7	-	-	-	-	-	-	-	-
C13	C13	HC	HC	M	67	170	62	21.45	-	7.01	117	211	6	17	6.22	73	25	4.93	7	0.5	-	-	-	-	-	-	-	-
C14	C14	HC	HC	F	51	158	58	23.23	-	6.79	129	245	27	31	7.71	64	31	1.6	7	0.5	-	-	-	-	-	-	-	-
C15	C15	HC	HC	F	60	155	53	22.06	-	7.47	134	261	16	21	6.75	64	10	0	5	0.5	-	-	-	-	-	-	-	-
C16	C16	HC	HC	F	53	150	50	22.22	-	6.08	138	240	14	22	3.44	70	13	0.05	10	0.5	-	-	-	-	-	-	-	-
C17	C17	HC	HC	F	48	158	60	24.03	-	6.7	82	372	12	15	3.17	54	50	0	8	0.5	-	-	-	-	-	-	-	-
C18	C18	HC	HC	F	53	165	60	22.04	-	5.42	144	162	14	23	5.58	83	9	0	7	1.3	-	-	-	-	-	-	-	-
C19	C19	HC	HC	F	32	156	46	18.9	-	5.13	128	336	22	18	4.9	58	20	0.5	8	0.5	-	-	-	-	-	-	-	-
C20	C20	HC	HC	F	30	152	47	20.34	-	6.11	112	380	18	19	3.6	52	36	1.7	6	0.5	-	-	-	-	-	-	-	-
C21	C21	HC	HC	F	69	156	46	18.9	-	4.28	122	278	10	18	4.37	73	59	5.29	5	0.5	-	-	-	-	-	-	-	-
C22	C22	HC	HC	F	71	150	45	20	-	9.02	145	276	29	20	6.9	65	8	1.3	7	0.5	-	-	-	-	-	-	-	-
S01.M0	S01	M0	HQT	F	26	165	52	19.1	3	7.8	128	238	8	15	3.6	56	63	1.8	8	0.5	9	7	30	60	70	60	1	5.67
S02.M0	S02	M0	HQT	F	47	165	63	23.14	24	4.94	80	300	15	17	5.4	66	111	0.8	95	200	11	8	30	50	50	40	3	6.07
S14.M0	S14	M0	LEF	F	31	158	45	18.03	1	5.07	130	239	24	16	3.77	50	25	0	86	200	7	5	30	60	60	70	0	4.46
S03.M0	S03	M0	HQT	F	45	158	60	24.03	120	7.09	115	323	8	15	4.87	58	93	26.9	15	55.6	14	2	60	50	50	50	4	7.06
S15.M0	S15	M0	LEF	F	40	160	48	18.75	96	7.19	106	302	13	14	4.24	62	19	5.34	31	102.8	16	6	60	60	60	40	8	7.78
S16.M0	S16	M0	LEF	F	58	158	55	22.03	84	7.52	101	384	24	23	2.2	74	78	37	20	73.3	18	1	60	60	60	50	8	8.29
S04.M0	S04	M0	HQT	M	58	170	60	20.76	12	9.41	290	76	12	10	4.1	68	76	46.6	312	10.2	7	5	60	40	40	20	1	5.57
S17.M0	S17	M0	LEF	F	44	155	45	18.73	48	5.29	131	230	9	16	4.91	57	23	1.7	29	84.8	11	10	120	50	50	40	5	6.5
S18.M0	S18	M0	LEF	F	54	162	60	22.86	24	12.27	132	306	17	18	5.3	66	80	20.8	398	14.8	3	2	40	70	60	60	5	4.17
S05.M0	S05	M0	HQT	F	53	160	55	21.48	3	6.73	126	272	11	14	3.38	59	69	19.3	174	53.2	3	3	10	70	60	70	2	4.28
S06.M0	S06	M0	HQT	F	50	160	63	24.61	120	6.04	105	187	8	14	5.06	62	38	26.7	165	33.7	7	4	30	80	80	80	11	5.8
S07.M0	S07	M0	HQT	F	61	154	58	24.46	96	5.16	108	308	9	18	6.1	51	74	42	18	33.2	10	2	10	70	50	60	5	6.37
S08.M0	S08	M0	HQT	M	53	175	65	21.22	24	14.7	141	377	58	20	7.5	77	75	46.4	1153	171.5	24	5	50	90	80	90	14	11.03
S09.M0	S09	M0	HQT	F	52	160	60	23.44	3	7.13	115	614	10	14	4.9	46	85	45.3	289	200	14	11	60	90	80	90	10	9.06
S10.M0	S10	M0	HQT	F	45	160	58	22.66	6	6.67	129	337	17	13	3.4	83	50	4.8	117	-	4	6	40	9	20	70	1	3.68
S19.M0	S19	M0	LEF	F	39	155	47	19.56	7	7.83	103	468	10	12	3.18	51	12	46.2	12	29	3	1	30	20	15	10	1	3.61
S11.M0	S11	M0	HQT	F	61	151	55	24.12	24	9.31	138	284	15	17	5.21	67	30	7.4	13	6.4	8	8	120	90	80	90	2	6.35
S12.M0	S12	M0	HQT	F	39	163	50	18.82	3	3.02	117	235	7	12	2.8	58	58	13	217	200	8	4	50	80	50	60	1	5.83
S20.M0	S20	M0	LEF	M	64	165	60	22.04	6	9.95	117	314	5	12	7.39	77	58	61.88	660	200	9	8	60	90	80	90	11	7.35
S21.M0	S21	M0	LEF	F	51	160	65	25.39	36	6.04	122	330	9	13	4.5	49	94	54.9	269	75.6	4	4	30	70	80	70	12	5.07
S13.M0	S13	M0	HQT	F	65	154.5	55.6	23.29	120	8.76	138	299	16	16	6.41	81	61	11.2	315	200	7	7	30	60	50	60	0	5.64
S22.M0	S22	M0	LEF	F	25	160	48	18.75	1	5.67	135	255	12	16	2.8	66	38	3.5	39	200	6	6	45	60	50	60	13	4.86
S01.M1	S01	M1	HQT	F	26	165	52	19.1	3	5.69	117	178	7	12	3.71	54	45	0	9	-	2	2	20	40	30	30	0	2.36
S02.M1	S02	M1	HQT	F	47	165	63	23.14	24	5.65	80	314	11	14	4.6	64	80	0.7	65	-	8	2	10	50	50	20	1	4.37
S14.M1	S14	M1	LEF	F	31	158	45	18.03	1	4.78	129	218	23	21	4.06	47	38	0.1	51	-	1	1	30	50	60	50	0	2.11
S03.M1	S03	M1	HQT	F	45	158	60	24.03	120	6.04	107	307	7	13	5	54	97	14.6	14	-	13	0	20	50	40	30	5	6.29
S15.M1	S15	M1	LEF	F	40	160	48	18.75	96	5.73	110	300	12	10	4.38	58	41	3.13	25	-	16	6	60	60	50	50	8	7.63
S16.M1	S16	M1	LEF	F	58	158	55	22.03	84	7.99	97	297	38	22	3.8	72	64	6.3	18	-	13	2	60	60	60	60	6	6.44
S04.M1	S04	M1	HQT	M	58	170	60	20.76	12	8.44	124	229	10	8	4.8	66	16	1.6	226	-	8	2	60	40	40	20	0	4.38
S17.M1	S17	M1	LEF	F	44	155	45	18.73	48	3.94	123	186	14	18	4.09	56	7	0	21	-	1	0	20	40	30	30	2	1.8
S18.M1	S18	M1	LEF	F	54	162	60	22.86	24	7.46	130	332	14	17	2.8	62	74	22.2	258	-	5	0	30	60	60	60	2	4.33
S05.M1	S05	M1	HQT	F	53	160	55	21.48	3	9.95	107	372	19	19	4.7	57	96	22.1	161	-	9	4	20	80	70	70	3	6.29
S06.M1	S06	M1	HQT	F	50	160	63	24.61	120	4.24	103	249	7	11	4.9	52	68	25.4	156	-	13	11	70	70	60	60	3	8.3
S07.M1	S07	M1	HQT	F	61	154	58	24.46	96	5.57	115	298	10	16	7.69	47	50	35.6	20	-	12	9	20	70	50	60	3	7.86
S08.M1	S08	M1	HQT	M	53	175	65	21.22	24	14.58	127	52	26	12	4.4	68	77	99.2	92	-	25	12	50	90	90	90	14	12.56
S09.M1	S09	M1	HQT	F	52	160	60	23.44	3	6.38	119	613	9	16	5.6	56	93	29.6	185	-	3	8	0	30	30	70	2	4.57
S10.M1	S10	M1	HQT	F	45	160	58	22.66	6	4.63	120	311	12	12	4.7	76	41	12	86	-	3	1	20	40	20	20	0	3.42
S19.M1	S19	M1	LEF	F	39	155	47	19.56	7	5.77	113	375	11	14	3.1	57	39	9.9	10	-	1	0	0	20	20	10	0	2.38
S11.M1	S11	M1	HQT	F	61	151	55	24.12	24	6.46	132	234	13	17	6.21	52	31	9.6	17	-	6	6	30	50	30	7	2	5.03
S12.M1	S12	M1	HQT	F	39	163	50	18.82	3	4.54	133	268	9	13	4.2	66	33	6.5	242	-	10	1	10	50	50	40	2	5.33
S20.M1	S20	M1	LEF	M	64	165	60	22.04	6	8	130	200	24	23	7.71	95	32	7.41	377	-	7	7	30	70	70	70	13	5.65
S21.M1	S21	M1	LEF	F	51	160	65	25.39	36	5.21	121	210	8	15	4.9	45	60	36.21	181	-	4	5	180	60	70	70	6	4.92
S13.M1	S13	M1	HQT	F	65	154.5	55.6	23.29	120	10.47	142	288	23	21	7.19	92	39	6.1	267	-	1	1	5	30	10	10	3	2.51
S22.M1	S22	M1	LEF	F	25	160	48	18.75	1	3.66	132	330	12	18	3.03	61	35	1.3	36	-	5	2	30	40	40	40	8	3.5
S01.M3	S01	M3	HQT	F	26	165	52	19.1	3	7.01	121	235	7	13	4.37	52	26	0.65	8	-	2	1	0	0	0	0	1	1.84
S02.M3	S02	M3	HQT	F	47	165	63	23.14	24	4.08	90	266	10	13	4.7	57	65	0	47	-	6	0	0	20	20	0	0	2.92
S14.M3	S14	M3	LEF	F	31	158	45	18.03	1	3.69	120	179	39	28	5.35	46	18	0	19	-	0	0	30	3	5	0	0	1
S03.M3	S03	M3	HQT	F	45	158	60	24.03	120	8.27	116	328	7	12	6.1	57	98	15.8	13	-	9	0	10	60	60	50	2	5.34
S15.M3	S15	M3	LEF	F	40	160	48	18.75	96	6.61	112	288	14	14	4.57	56	35	5.34	23	-	17	2	60	60	60	50	6	7.5
S16.M3	S16	M3	LEF	F	58	158	55	22.03	84	6.81	107	238	19	21	2.8	74	44	3.2	16	-	9	2	10	60	60	60	3	5.12
S04.M3	S04	M3	HQT	M	58	170	60	20.76	12	9.35	140	225	7	12	6.3	65	13	10.5	209	-	2	0	15	30	30	30	0	2.82
S17.M3	S17	M3	LEF	F	44	155	45	18.73	48	3.98	125	198	20	24	5.84	60	18	0.1	19	-	1	0	0	0	0	0	4	1.27
S18.M3	S18	M3	LEF	F	54	162	60	22.86	24	9.24	2.45	270	15	18	4.41	63	68	18.3	85	-	3	2	20	40	40	30	3	3.71
S05.M3	S05	M3	HQT	F	53	160	55	21.48	3	9.8	92	460	13	15	5.8	53	120	57.4	384	-	9	7	30	80	70	80	13	7.04
S06.M3	S06	M3	HQT	F	50	160	63	24.61	120	8.58	114	238	9	13	5.1	53	28	7.6	123	-	4	1	10	30	30	30	0	3.41
S07.M3	S07	M3	HQT	F	61	154	58	24.46	96	5.31	128	218	12	19	6.3	50	34	24.7	17	-	6	1	10	20	20	20	0	4.23
S08.M3	S08	M3	HQT	M	53	175	65	21.22	24	12.07	120	527	9	6	4.2	56	88	55.3	840	-	5	3	20	50	50	50	14	4.93
S09.M3	S09	M3	HQT	F	52	160	60	23.44	3	6.88	136	450	9	16	5.6	56	93	29.6	185	-	4	0	10	30	30	30	4	3.73
S10.M3	S10	M3	HQT	F	45	160	58	22.66	6	6.48	123	334	10	12	5.7	70	43	1.9	65	-	1	1	0	10	10	10	0	1.9
S19.M3	S19	M3	LEF	F	39	155	47	19.56	7	8.21	117	333	9	11	3.4	56	7	1	8	-	2	0	0	20	0	0	0	2.05
S11.M3	S11	M3	HQT	F	61	151	55	24.12	24	8.06	135	231	13	17	5.39	54	19	4.6	11	-	8	5	30	20	30	20	4	4.8
S12.M3	S12	M3	HQT	F	39	163	50	18.82	3	4.82	125	294	7	11	3.6	57	44	14.2	213	-	10	10	120	80	60	80	9	7.26
S20.M3	S20	M3	LEF	M	64	165	60	22.04	6	7.57	119	276	12	24	8.68	90	46	46.36	283	-	8	9	60	80	80	80	8	6.97
S21.M3	S21	M3	LEF	F	51	160	65	25.39	36	5.77	115	205	11	16	4.52	41	67	24.24	189	-	4	2	60	40	40	40	3	4.08
S13.M3	S13	M3	HQT	F	65	154.5	55.6	23.29	120	10.07	149	260	21	19	8.01	93	70	5.84	252	-	2	0	5	40	40	40	0	2.77
S22.M3	S22	M3	LEF	F	25	160	48	18.75	1	5.66	125	224	8	14	3.58	60	36	0.6	30	-	6	0	30	30	30	20	3	3.23
S01.M6	S01	M6	HQT	F	26	165	52	19.1	3	6.78	124	206	8	13	3.61	55	21	1.58	8	0.5	0	0	0	0	0	0	0	1.3
S02.M6	S02	M6	HQT	F	47	165	63	23.14	24	3.79	102	228	10	15	4.6	53	33	0	20	-	6	4	0	40	30	20	0	3.76
S14.M6	S14	M6	LEF	F	31	158	45	18.03	1	7.35	128	251	22	21	4.88	67	33	1	14	200	0	0	0	0	0	0	0	1.21
S03.M6	S03	M6	HQT	F	45	158	60	24.03	120	5.42	119	241	10	17	4.7	60	38	21	13	15	4	0	0	20	20	20	2	3.47
S15.M6	S15	M6	LEF	F	40	160	48	18.75	96	6.87	111	334	11	12	3.64	56	67	7.82	30.2	110.9	15	3	45	50	50	50	6	7.06
S16.M6	S16	M6	LEF	F	58	158	55	22.03	84	6.15	99	290	28	27	3.2	74	13	4.9	14.4	71.2	6	0	3	50	50	50	1	3.98
S04.M6	S04	M6	HQT	M	58	170	60	20.76	12	12.68	132	254	10	12	4	65	23	10.6	124	7.4	2	0	60	40	40	30	0	2.96
S17.M6	S17	M6	LEF	F	44	155	45	18.73	48	4.93	125	199	27	30	4.69	56	23	2.6	31	164.4	4	0	10	20	10	10	0	2.82
S18.M6	S18	M6	LEF	F	54	162	60	22.86	24	7.09	126	247	40	20	3.02	54	84	14.6	55	6.5	3	0	10	40	50	30	11	3.35
S05.M6	S05	M6	HQT	F	53	160	55	21.48	3	6.41	83	412	10	13	4.86	49	120	108.5	981	165.2	7	8	60	30	50	50	10	6.15
S06.M6	S06	M6	HQT	F	50	160	63	24.61	120	8.13	112	184	11	17	6.4	52	22	4.7	88	16.6	0	0	0	10	10	0	0	1.73
S07.M6	S07	M6	HQT	F	61	154	58	24.46	96	4.54	121	196	11	21	5.9	53	11	0	19	21.5	0	0	0	10	10	10	0	1.1
S08.M6	S08	M6	HQT	M	53	175	65	21.22	24	12.95	123	486	18	15	6.5	63	86	42.8	480	200	6	2	20	30	30	30	1	4.7
S09.M6	S09	M6	HQT	F	52	160	60	23.44	3	7.42	126	578	9	15	6.54	45	69	22	98	145.4	2	4	10	10	20	20	1	3.35
S10.M6	S10	M6	HQT	F	45	160	58	22.66	6	6.08	124	330	11	16	5.7	74	43	3	68	28	0	2	0	0	0	0	0	1.74
S19.M6	S19	M6	LEF	F	39	155	47	19.56	7	8.11	121	310	12	16	4.5	56	10	0.9	10	17.2	0	0	0	10	10	10	0	1.33
S11.M6	S11	M6	HQT	F	61	151	55	24.12	24	8.05	148	262	12	19	4.79	63	20	5.4	10	5	6	7	5	3	0	3	0	4.33
S12.M6	S12	M6	HQT	F	39	163	50	18.82	3	5.03	121	261	10	11	4.7	70	37	6.2	128	200	3	0	15	10	10	0	0	2.65
S20.M6	S20	M6	LEF	M	64	165	60	22.04	6	6.72	108	352	12	16	6.23	75	33	99.78	214	200	8	9	60	70	70	70	13	7.1
S21.M6	S21	M6	LEF	F	51	160	65	25.39	36	3.8	122	216	26	27	4.99	51	33	0.91	54	51.9	2	1	10	10	10	10	3	2.03
S13.M6	S13	M6	HQT	F	65	154.5	55.6	23.29	120	11.76	143	338	11	15	8.2	102	57	16.9	385	-	14	0	15	20	20	20	3	6.2
S22.M6	S22	M6	LEF	F	25	160	48	18.75	1	5.58	126	225	9	13	3.3	67	42	0	16	200	1	0	0	10	10	20	0	1.38

## Sheet: Table S2
Table S2 Data production.
Sample name	Raw data (Gb)	Clean data (Gb)	Data utilization ratio (%)	Data unmapping host (Gb)	Reads mapping host ratio (%)
C01	9.12	8.34	91.47	8.32856	0.117
C02	8.4	7.5	89.32	7.50204	0.033
C03	8.3	7.55	90.93	7.54065	0.089
C04	9.31	8.46	90.91	8.45713	0.035
C05	8.72	7.98	91.5	7.97483	0.041
C06	8.38	7.65	91.22	7.55204	1.254
C07	6.7	6.14	91.52	6.13289	0.05
C08	8.61	7.87	91.43	7.86634	0.094
C09	11.28	9.6	85.14	9.33256	2.801
C10	10.02	8.66	86.46	8.60529	0.618
C11	8.81	7.69	87.29	7.68616	0.046
C12	8.09	7	86.61	6.98838	0.225
C13	8.88	7.68	86.55	7.66245	0.288
C14	7.94	6.94	87.39	6.93641	0.054
C15	8.22	7.08	86.13	7.07235	0.068
C16	9.17	7.95	86.66	7.94072	0.085
C17	7.69	6.66	86.66	6.64836	0.204
C18	8.4	7.3	86.85	7.23257	0.886
C19	8.99	7.71	85.78	7.70354	0.06
C20	8.71	7.5	86.13	7.468	0.483
C21	8.33	7.2	86.38	7.1778	0.277
C22	9.79	8.52	87.04	8.51574	0.092
S01.M0	10.9	8.87	81.45	8.83789	0.414
S02.M0	10.33	9.11	88.21	9.03429	0.877
S14.M0	10.68	9.02	84.46	9.02301	0.017
S03.M0	8.55	7.55	88.39	7.53592	0.232
S15.M0	7.09	6.27	88.43	6.24363	0.366
S16.M0	10.71	9.2	85.93	9.16295	0.431
S04.M0	8.6	7.56	87.87	7.55305	0.081
S17.M0	9.29	7.83	84.33	7.82984	0.028
S18.M0	9.58	8.52	88.91	8.52008	0.019
S05.M0	8.06	7.23	89.78	7.23071	0.022
S06.M0	9.65	8.55	88.6	8.55061	0.044
S07.M0	8.34	7.54	90.41	7.53406	0.059
S08.M0	9.01	8.1	89.84	7.89363	2.528
S09.M0	10.11	8.71	86.12	8.70654	0.013
S10.M0	11.67	10.09	86.43	10.0786	0.071
S19.M0	10.58	9.21	87.04	9.18023	0.285
S11.M0	10.93	9.25	84.59	9.24792	0.015
S12.M0	9.45	7.99	84.52	7.98366	0.042
S20.M0	10.96	9.54	86.98	9.5337	0.014
S21.M0	10.41	9.04	86.86	8.8146	2.52
S13.M0	11.67	10.07	86.33	10.0676	0.033
S22.M0	9.95	8.65	86.91	8.61685	0.339
S01.M1	9.63	7.96	82.62	7.85175	1.305
S02.M1	8.96	7.79	86.94	7.78573	0.013
S14.M1	9.22	7.8	84.68	7.60432	2.552
S03.M1	8.59	7.58	88.24	7.57126	0.107
S15.M1	9.81	8.51	86.78	7.96923	6.373
S16.M1	9.3	8.08	86.96	8.03806	0.58
S04.M1	10.14	8.89	87.72	8.88018	0.143
S17.M1	9.76	8.26	84.59	8.25827	0.021
S18.M1	9.98	8.96	89.74	8.95494	0.041
S05.M1	8.8	7.98	90.73	7.974	0.138
S06.M1	8.9	8.03	90.21	7.99095	0.433
S07.M1	8.88	7.94	89.49	7.72238	2.769
S08.M1	9.44	8.53	90.41	8.52401	0.103
S09.M1	8.06	7.04	87.34	7.03668	0.058
S10.M1	9.14	7.92	86.62	7.90693	0.12
S19.M1	8.83	7.67	86.83	7.65704	0.141
S11.M1	9.58	7.98	83.33	7.98381	0.012
S12.M1	8.61	7.28	84.56	7.2736	0.053
S20.M1	10.78	9.36	86.81	9.3114	0.475
S21.M1	10.6	9.12	86.03	8.80639	3.438
S13.M1	9.58	8.38	87.41	8.37621	0.022
S22.M1	10.08	8.78	87.13	8.61059	1.921
S01.M3	8.44	7.34	86.99	7.34128	0.017
S02.M3	8.9	7.85	88.25	7.85137	0.041
S14.M3	9.17	8	87.24	7.99339	0.028
S03.M3	11.26	9.84	87.43	9.66184	1.824
S15.M3	9.91	8.71	87.94	8.70733	0.042
S16.M3	9.57	8.62	90.06	8.61593	0.012
S04.M3	8.6	7.6	88.31	7.56358	0.45
S17.M3	8.54	7.45	87.14	7.44521	0.01
S18.M3	9.72	8.54	87.81	8.39898	1.605
S05.M3	9.52	8.33	87.51	8.32339	0.124
S06.M3	9.91	8.87	89.52	8.86894	0.019
S07.M3	9.88	8.92	90.29	8.89977	0.185
S08.M3	8.95	8.01	89.48	8.00434	0.049
S09.M3	8.51	7.4	87	7.40017	0.023
S10.M3	9.42	8.2	87.01	8.18876	0.08
S19.M3	8.41	7.19	85.54	7.02518	2.35
S11.M3	9.69	8.55	88.27	8.55108	0.009
S12.M3	7.4	6.48	87.49	6.45077	0.419
S20.M3	8.98	7.74	86.26	7.73966	0.029
S21.M3	9.58	8.26	86.23	8.21544	0.54
S13.M3	9.04	7.62	84.32	7.62202	0.015
S22.M3	10.05	8.71	86.63	8.70707	0.028
S01.M6	8.49	7.4	87.19	7.3978	0.038
S02.M6	10.95	9.48	86.54	9.47602	0.015
S14.M6	10.51	9.42	89.63	9.39948	0.238
S03.M6	8.63	7.49	86.76	7.47564	0.144
S15.M6	9.94	8.42	84.75	8.40341	0.223
S16.M6	11.41	9.75	85.46	9.74493	0.079
S04.M6	10.02	8.41	83.92	8.40274	0.049
S17.M6	11.43	10.3	90.08	10.2651	0.304
S18.M6	10.19	8.97	88.02	8.97194	0.015
S05.M6	8.52	7.71	90.47	7.66891	0.502
S06.M6	9.76	8.74	89.53	8.72329	0.185
S07.M6	8.91	7.95	89.23	7.86474	1.065
S08.M6	9.59	8.59	89.58	8.57659	0.136
S09.M6	8.72	7.63	87.49	7.62667	0.01
S10.M6	10.01	8.62	86.14	8.50901	1.333
S19.M6	10.23	8.76	85.62	8.7157	0.487
S11.M6	9.54	8.18	85.79	8.18225	0.025
S12.M6	10.51	9.02	85.78	8.91194	1.151
S20.M6	8.76	7.59	86.67	7.58816	0.038
S21.M6	10.16	8.79	86.57	8.7697	0.245
S13.M6	10.31	8.65	83.88	8.64697	0.012
S22.M6	11.6	9.71	83.77	9.71189	0.014
Total	1036.69	904.53	-	900.2	-
Average	9.42445	8.223	87.332	8.18364	0.467045
SD	1.00727	0.831473	2.08398	0.822351	0.916264

## Sheet: Table S3
Table S3 Significant differences taxa between HC and RA.
Level	Taxa	HC			RA			Enrichment	P value
		Mean relative abundance	Mean rank	Occurrence rate	Mean relative abundance	Mean rank	Occurrence rate
Phylum	k__Bacteria|p__Synergistetes	0.0997305	27	0.773	0.0193986	18	0.455	HC	0.029547
Class	k__Bacteria|p__Proteobacteria|c__Epsilonproteobacteria	0.00193045	18	0.727	0.00538409	28	0.955	RA	0.0100142
	k__Bacteria|p__Synergistetes|c__Synergistia	0.0997305	27	0.773	0.0193986	18	0.455	HC	0.029547
Order	k__Bacteria|p__Proteobacteria|c__Gammaproteobacteria|o__Aeromonadales	0.0116086	17	0.591	0.0388659	28	0.818	RA	0.00746404
	k__Bacteria|p__Proteobacteria|c__Epsilonproteobacteria|o__Campylobacterales	0.00193045	18	0.727	0.00538409	28	0.955	RA	0.0100142
	k__Bacteria|p__Proteobacteria|c__Gammaproteobacteria|o__Cardiobacteriales	0.000255455	17	0.318	0.000932727	28	0.727	RA	0.00516128
	k__Bacteria|p__Proteobacteria|c__Betaproteobacteria|o__Neisseriales	0.00718955	17	0.864	0.168357	28	1	RA	0.00623904
	k__Bacteria|p__Proteobacteria|c__Gammaproteobacteria|o__Pasteurellales	0.111669	17	1	0.422998	28	1	RA	0.00393962
	k__Bacteria|p__Synergistetes|c__Synergistia|o__Synergistales	0.0997305	27	0.773	0.0193986	18	0.455	HC	0.029547
	k__Bacteria|p__Proteobacteria|c__Gammaproteobacteria|o__Xanthomonadales	0.363713	33	1	0.0707777	12	1	HC	1.90105e-12
Family	k__Bacteria|p__Proteobacteria|c__Betaproteobacteria|o__Burkholderiales|f__Burkholderiaceae	0.00102864	18	0.409	0.00167409	27	0.727	RA	0.015904
	k__Bacteria|p__Proteobacteria|c__Betaproteobacteria|o__Burkholderiales|f__Burkholderiales_noname	0.115472	27	1	0.0579541	18	0.864	HC	0.0156015
	k__Bacteria|p__Proteobacteria|c__Epsilonproteobacteria|o__Campylobacterales|f__Campylobacteraceae	0.00193045	18	0.727	0.00523591	27	0.955	RA	0.0114616
	k__Bacteria|p__Proteobacteria|c__Gammaproteobacteria|o__Cardiobacteriales|f__Cardiobacteriaceae	0.000255455	17	0.318	0.000932727	28	0.727	RA	0.00516128
	k__Bacteria|p__Firmicutes|c__Bacilli|o__Lactobacillales|f__Enterococcaceae	0.139762	31	1	0.00936273	14	0.636	HC	1.55898e-05
	k__Bacteria|p__Proteobacteria|c__Epsilonproteobacteria|o__Campylobacterales|f__Helicobacteraceae	0	20	0	0.000148182	25	0.227	RA	0.0202766
	k__Bacteria|p__Fusobacteria|c__Fusobacteriia|o__Fusobacteriales|f__Leptotrichiaceae	0.000186818	19	0.182	0.000542727	26	0.545	RA	0.0246046
	k__Bacteria|p__Proteobacteria|c__Betaproteobacteria|o__Neisseriales|f__Neisseriaceae	0.00718955	17	0.864	0.168357	28	1	RA	0.00623904
	k__Bacteria|p__Proteobacteria|c__Gammaproteobacteria|o__Pasteurellales|f__Pasteurellaceae	0.111669	17	1	0.422998	28	1	RA	0.00393962
	k__Bacteria|p__Proteobacteria|c__Gammaproteobacteria|o__Aeromonadales|f__Succinivibrionaceae	0.0113332	18	0.5	0.0387423	27	0.773	RA	0.0119323
	k__Bacteria|p__Synergistetes|c__Synergistia|o__Synergistales|f__Synergistaceae	0.0997305	27	0.773	0.0193986	18	0.455	HC	0.029547
	k__Bacteria|p__Proteobacteria|c__Gammaproteobacteria|o__Xanthomonadales|f__Xanthomonadaceae	0.363713	33	1	0.0707777	12	1	HC	1.90105e-12
Genus	k__Bacteria|p__Firmicutes|c__Negativicutes|o__Selenomonadales|f__Acidaminococcaceae|g__Acidaminococcus	0.0399664	27	0.955	0.00730636	18	0.545	HC	0.0261611
	k__Bacteria|p__Proteobacteria|c__Gammaproteobacteria|o__Pasteurellales|f__Pasteurellaceae|g__Aggregatibacter	0.00136864	16	0.545	0.0101986	29	0.909	RA	0.00131317
	k__Bacteria|p__Firmicutes|c__Negativicutes|o__Selenomonadales|f__Veillonellaceae|g__Anaeroglobus	0.000368636	19	0.364	0.00108818	26	0.682	RA	0.0453303
	k__Bacteria|p__Firmicutes|c__Clostridia|o__Clostridiales|f__Ruminococcaceae|g__Anaerotruncus	0.127555	26	1	0.0431564	19	1	HC	0.0493041
	k__Bacteria|p__Proteobacteria|c__Betaproteobacteria|o__Burkholderiales|f__Burkholderiales_noname|g__Burkholderiales_noname	0.115472	27	1	0.0579541	18	0.864	HC	0.0156015
	k__Bacteria|p__Proteobacteria|c__Epsilonproteobacteria|o__Campylobacterales|f__Campylobacteraceae|g__Campylobacter	0.00184591	18	0.727	0.00522773	27	0.955	RA	0.0122527
	k__Bacteria|p__Proteobacteria|c__Gammaproteobacteria|o__Cardiobacteriales|f__Cardiobacteriaceae|g__Cardiobacteriaceae_unclassified	3.7273e-05	19	0.136	0.000324545	26	0.409	RA	0.0404069
	k__Bacteria|p__Proteobacteria|c__Gammaproteobacteria|o__Cardiobacteriales|f__Cardiobacteriaceae|g__Cardiobacterium	0.000218636	18	0.227	0.000599545	27	0.591	RA	0.0177405
	k__Bacteria|p__Firmicutes|c__Negativicutes|o__Selenomonadales|f__Veillonellaceae|g__Dialister	0.594269	28	1	0.0233441	17	0.682	HC	0.00659854
	k__Bacteria|p__Proteobacteria|c__Betaproteobacteria|o__Neisseriales|f__Neisseriaceae|g__Eikenella	0.000315455	18	0.136	0.000613182	27	0.545	RA	0.0139425
	k__Bacteria|p__Proteobacteria|c__Gammaproteobacteria|o__Enterobacteriales|f__Enterobacteriaceae|g__Enterobacter	0.0302345	18	0.727	0.099745	27	0.864	RA	0.0259071
	k__Bacteria|p__Firmicutes|c__Bacilli|o__Lactobacillales|f__Enterococcaceae|g__Enterococcus	0.139762	31	1	0.00936273	14	0.636	HC	1.55898e-05
	k__Bacteria|p__Actinobacteria|c__Actinobacteria|o__Coriobacteriales|f__Coriobacteriaceae|g__Enterorhabdus	0.00145136	27	0.636	0.000438636	18	0.318	HC	0.0248659
	k__Bacteria|p__Proteobacteria|c__Gammaproteobacteria|o__Pasteurellales|f__Pasteurellaceae|g__Haemophilus	0.109761	17	1	0.408801	28	1	RA	0.00426999
	k__Bacteria|p__Proteobacteria|c__Epsilonproteobacteria|o__Campylobacterales|f__Helicobacteraceae|g__Helicobacter	0	20	0	0.000148182	25	0.227	RA	0.0202766
	k__Bacteria|p__Firmicutes|c__Clostridia|o__Clostridiales|f__Lachnospiraceae|g__Johnsonella	0	20	0	7.1818e-05	24	0.182	RA	0.040641
	k__Bacteria|p__Proteobacteria|c__Betaproteobacteria|o__Burkholderiales|f__Burkholderiaceae|g__Lautropia	0.00102864	18	0.409	0.00164909	27	0.727	RA	0.0159081
	k__Bacteria|p__Firmicutes|c__Negativicutes|o__Selenomonadales|f__Veillonellaceae|g__Megasphaera	0.210852	27	1	0.0161855	18	0.818	HC	0.0108443
	k__Bacteria|p__Proteobacteria|c__Betaproteobacteria|o__Neisseriales|f__Neisseriaceae|g__Neisseria	0.00679682	17	0.864	0.167703	28	1	RA	0.00855363
	k__Bacteria|p__Proteobacteria|c__Betaproteobacteria|o__Burkholderiales|f__Sutterellaceae|g__Parasutterella	0.140801	27	1	0.102293	18	0.818	HC	0.0220568
	k__Bacteria|p__Firmicutes|c__Clostridia|o__Clostridiales|f__Clostridiales_Family_XI_Incertae_Sedis|g__Parvimonas	0.00101818	27	0.773	0.00142682	18	0.545	HC	0.0311044
	k__Bacteria|p__Proteobacteria|c__Gammaproteobacteria|o__Pasteurellales|f__Pasteurellaceae|g__Pasteurella	0.000119091	19	0.273	0.00166273	26	0.5	RA	0.0447031
	k__Bacteria|p__Firmicutes|c__Negativicutes|o__Selenomonadales|f__Acidaminococcaceae|g__Phascolarctobacterium	0.000367727	17	0.455	0.386436	28	0.773	RA	0.00401092
	k__Bacteria|p__Proteobacteria|c__Gammaproteobacteria|o__Aeromonadales|f__Succinivibrionaceae|g__Succinatimonas	0.0113332	18	0.5	0.0387423	27	0.773	RA	0.0119323
	k__Bacteria|p__Firmicutes|c__Negativicutes|o__Selenomonadales|f__Veillonellaceae|g__Veillonella	0.0826268	19	1	0.261223	26	1	RA	0.0439659
	k__Bacteria|p__Proteobacteria|c__Gammaproteobacteria|o__Xanthomonadales|f__Xanthomonadaceae|g__Xanthomonas	0.363695	33	1	0.0707577	12	1	HC	1.90105e-12
Species	k__Bacteria|p__Firmicutes|c__Negativicutes|o__Selenomonadales|f__Acidaminococcaceae|g__Acidaminococcus|s__Acidaminococcus_intestini	0.02436	28	0.864	0.00534954	17	0.364	HC	0.00606559
	k__Bacteria|p__Actinobacteria|c__Actinobacteria|o__Actinomycetales|f__Actinomycetaceae|g__Actinomyces|s__Actinomyces_massiliensis	0.000960909	27	0.636	0.000222273	18	0.409	HC	0.0277906
	k__Bacteria|p__Proteobacteria|c__Gammaproteobacteria|o__Pasteurellales|f__Pasteurellaceae|g__Aggregatibacter|s__Aggregatibacter_segnis	0.000605455	16	0.5	0.00885364	29	0.864	RA	0.000767498
	k__Bacteria|p__Firmicutes|c__Negativicutes|o__Selenomonadales|f__Veillonellaceae|g__Anaeroglobus|s__Anaeroglobus_geminatus	0.000368636	19	0.364	0.00108818	26	0.682	RA	0.0453303
	k__Bacteria|p__Bacteroidetes|c__Bacteroidia|o__Bacteroidales|f__Bacteroidaceae|g__Bacteroides|s__Bacteroides_faecis	0.35514	18	1	1.96563	27	1	RA	0.022434
	k__Bacteria|p__Actinobacteria|c__Actinobacteria|o__Bifidobacteriales|f__Bifidobacteriaceae|g__Bifidobacterium|s__Bifidobacterium_bifidum	0.056625	28	0.727	0.00548273	17	0.364	HC	0.00376575
	k__Bacteria|p__Proteobacteria|c__Betaproteobacteria|o__Burkholderiales|f__Burkholderiales_noname|g__Burkholderiales_noname|s__Burkholderiales_bacterium_1_1_47	0.115472	27	1	0.0579541	18	0.864	HC	0.0156015
	k__Bacteria|p__Proteobacteria|c__Epsilonproteobacteria|o__Campylobacterales|f__Campylobacteraceae|g__Campylobacter|s__Campylobacter_concisus	0.000322273	19	0.273	0.00245546	26	0.545	RA	0.0496764
	k__Bacteria|p__Proteobacteria|c__Epsilonproteobacteria|o__Campylobacterales|f__Campylobacteraceae|g__Campylobacter|s__Campylobacter_gracilis	0.000195455	18	0.409	0.00116136	27	0.636	RA	0.0229171
	k__Bacteria|p__Proteobacteria|c__Gammaproteobacteria|o__Cardiobacteriales|f__Cardiobacteriaceae|g__Cardiobacterium|s__Cardiobacterium_hominis	0.000138636	19	0.136	0.000288636	26	0.455	RA	0.0374297
	k__Bacteria|p__Proteobacteria|c__Gammaproteobacteria|o__Cardiobacteriales|f__Cardiobacteriaceae|g__Cardiobacterium|s__Cardiobacterium_valvarum	8.0455e-05	19	0.182	0.000311818	26	0.455	RA	0.0368691
	k__Bacteria|p__Firmicutes|c__Clostridia|o__Clostridiales|f__Peptostreptococcaceae|g__Peptostreptococcaceae_noname|s__Clostridium_bartlettii	0.0590336	27	0.955	0.0113314	18	0.864	HC	0.0188658
	k__Bacteria|p__Firmicutes|c__Clostridia|o__Clostridiales|f__Clostridiaceae|g__Clostridium|s__Clostridium_celatum	0.00636682	26	0.364	0.000573182	20	0.0909	HC	0.0362047
	k__Bacteria|p__Firmicutes|c__Clostridia|o__Clostridiales|f__Peptostreptococcaceae|g__Peptostreptococcaceae_noname|s__Clostridium_hiranonis	0.000217273	19	0.182	0.0102491	26	0.545	RA	0.0198558
	k__Bacteria|p__Firmicutes|c__Negativicutes|o__Selenomonadales|f__Veillonellaceae|g__Dialister|s__Dialister_invisus	0.579139	29	1	0.0209118	16	0.591	HC	0.0015194
	k__Bacteria|p__Proteobacteria|c__Betaproteobacteria|o__Neisseriales|f__Neisseriaceae|g__Eikenella|s__Eikenella_corrodens	0.000315455	18	0.136	0.000613182	27	0.545	RA	0.0139425
	k__Bacteria|p__Proteobacteria|c__Gammaproteobacteria|o__Enterobacteriales|f__Enterobacteriaceae|g__Enterobacter|s__Enterobacter_aerogenes	0.00206864	19	0.318	0.0385482	26	0.591	RA	0.0377969
	k__Bacteria|p__Proteobacteria|c__Gammaproteobacteria|o__Enterobacteriales|f__Enterobacteriaceae|g__Enterobacter|s__Enterobacter_cloacae	0.0269077	17	0.591	0.0602459	28	0.864	RA	0.0068663
	k__Bacteria|p__Firmicutes|c__Bacilli|o__Lactobacillales|f__Enterococcaceae|g__Enterococcus|s__Enterococcus_faecalis	0.132398	32	0.955	0.00183045	13	0.227	HC	9.00806e-07
	k__Bacteria|p__Firmicutes|c__Bacilli|o__Lactobacillales|f__Enterococcaceae|g__Enterococcus|s__Enterococcus_faecium	0.00564409	29	0.773	0.00282591	16	0.136	HC	0.000181244
	k__Bacteria|p__Actinobacteria|c__Actinobacteria|o__Coriobacteriales|f__Coriobacteriaceae|g__Enterorhabdus|s__Enterorhabdus_caecimuris	0.00145136	27	0.636	0.000438636	18	0.318	HC	0.0248659
	k__Bacteria|p__Firmicutes|c__Erysipelotrichia|o__Erysipelotrichales|f__Erysipelotrichaceae|g__Erysipelotrichaceae_noname|s__Erysipelotrichaceae_bacterium_3_1_53	0.0230632	33	1	0.000544091	12	0.136	HC	5.13944e-08
	k__Bacteria|p__Fusobacteria|c__Fusobacteriia|o__Fusobacteriales|f__Fusobacteriaceae|g__Fusobacterium|s__Fusobacterium_varium	0.160759	29	1	0.0227764	16	0.318	HC	0.00031279
	k__Bacteria|p__Firmicutes|c__Bacilli|o__Bacillales|f__Bacillales_noname|g__Gemella|s__Gemella_unclassified	0.000232273	26	0.409	4.3182e-05	19	0.136	HC	0.0312273
	k__Bacteria|p__Proteobacteria|c__Gammaproteobacteria|o__Pasteurellales|f__Pasteurellaceae|g__Haemophilus|s__Haemophilus_haemolyticus	0.00129546	18	0.682	0.00550318	27	0.864	RA	0.0188083
	k__Bacteria|p__Proteobacteria|c__Gammaproteobacteria|o__Pasteurellales|f__Pasteurellaceae|g__Haemophilus|s__Haemophilus_parainfluenzae	0.105493	17	1	0.38204	28	1	RA	0.00426999
	k__Bacteria|p__Proteobacteria|c__Gammaproteobacteria|o__Pasteurellales|f__Pasteurellaceae|g__Haemophilus|s__Haemophilus_paraphrohaemolyticus	0.000424545	17	0.273	0.00435091	28	0.727	RA	0.00375605
	k__Bacteria|p__Proteobacteria|c__Gammaproteobacteria|o__Pasteurellales|f__Pasteurellaceae|g__Haemophilus|s__Haemophilus_pittmaniae	0.00025	18	0.227	0.00228091	27	0.591	RA	0.00779603
	k__Bacteria|p__Proteobacteria|c__Gammaproteobacteria|o__Pasteurellales|f__Pasteurellaceae|g__Haemophilus|s__Haemophilus_sputorum	0.00137727	18	0.409	0.00966136	27	0.773	RA	0.00926864
	k__Bacteria|p__Firmicutes|c__Clostridia|o__Clostridiales|f__Lachnospiraceae|g__Johnsonella|s__Johnsonella_ignava	0	20	0	7.1818e-05	24	0.182	RA	0.040641
	k__Bacteria|p__Firmicutes|c__Clostridia|o__Clostridiales|f__Lachnospiraceae|g__Lachnospiraceae_noname|s__Lachnospiraceae_bacterium_2_1_46FAA	0.0336291	27	0.909	0.000852273	18	0.773	HC	0.0323234
	k__Bacteria|p__Firmicutes|c__Bacilli|o__Lactobacillales|f__Lactobacillaceae|g__Lactobacillus|s__Lactobacillus_fermentum	4.1818e-05	17	0.136	0.0122905	28	0.591	RA	0.000730625
	k__Bacteria|p__Firmicutes|c__Bacilli|o__Lactobacillales|f__Lactobacillaceae|g__Lactobacillus|s__Lactobacillus_mucosae	0.104625	27	0.818	0.00199636	18	0.455	HC	0.0332507
	k__Bacteria|p__Proteobacteria|c__Betaproteobacteria|o__Burkholderiales|f__Burkholderiaceae|g__Lautropia|s__Lautropia_mirabilis	0.00102864	18	0.409	0.00164909	27	0.727	RA	0.0159081
	k__Bacteria|p__Firmicutes|c__Negativicutes|o__Selenomonadales|f__Veillonellaceae|g__Megasphaera|s__Megasphaera_elsdenii	0.00818409	27	0.455	0.000119091	18	0.0909	HC	0.00741195
	k__Bacteria|p__Firmicutes|c__Negativicutes|o__Selenomonadales|f__Veillonellaceae|g__Megasphaera|s__Megasphaera_unclassified	0.136625	25	0.364	0.00189818	20	0.136	HC	0.0464932
	k__Bacteria|p__Proteobacteria|c__Betaproteobacteria|o__Neisseriales|f__Neisseriaceae|g__Neisseria|s__Neisseria_macacae	0.000749545	19	0.182	0.000714545	26	0.545	RA	0.0303403
	k__Bacteria|p__Proteobacteria|c__Betaproteobacteria|o__Neisseriales|f__Neisseriaceae|g__Neisseria|s__Neisseria_meningitidis	0.000785909	18	0.182	0.160668	27	0.545	RA	0.0100429
	k__Bacteria|p__Proteobacteria|c__Betaproteobacteria|o__Neisseriales|f__Neisseriaceae|g__Neisseria|s__Neisseria_subflava	0.000472727	19	0.227	0.000652727	26	0.545	RA	0.0433079
	k__Bacteria|p__Proteobacteria|c__Betaproteobacteria|o__Burkholderiales|f__Sutterellaceae|g__Parasutterella|s__Parasutterella_excrementihominis	0.140801	27	1	0.102293	18	0.818	HC	0.0220568
	k__Bacteria|p__Firmicutes|c__Negativicutes|o__Selenomonadales|f__Acidaminococcaceae|g__Phascolarctobacterium|s__Phascolarctobacterium_succinatutens	0.000367727	17	0.455	0.386436	28	0.773	RA	0.00401092
	k__Bacteria|p__Bacteroidetes|c__Bacteroidia|o__Bacteroidales|f__Porphyromonadaceae|g__Porphyromonas|s__Porphyromonas_cansulci	0.0389618	27	0.545	0.000609545	18	0.136	HC	0.00369469
	k__Bacteria|p__Bacteroidetes|c__Bacteroidia|o__Bacteroidales|f__Porphyromonadaceae|g__Porphyromonas|s__Porphyromonas_gingivalis	0	20	0	0.000222273	25	0.227	RA	0.0202766
	k__Bacteria|p__Bacteroidetes|c__Bacteroidia|o__Bacteroidales|f__Porphyromonadaceae|g__Porphyromonas|s__Porphyromonas_somerae	0.0194777	18	0.273	0.163115	27	0.591	RA	0.00776397
	k__Bacteria|p__Firmicutes|c__Negativicutes|o__Selenomonadales|f__Veillonellaceae|g__Selenomonas|s__Selenomonas_noxia	6.9545e-05	19	0.136	0.000286364	26	0.455	RA	0.0324149
	k__Bacteria|p__Actinobacteria|c__Actinobacteria|o__Coriobacteriales|f__Coriobacteriaceae|g__Slackia|s__Slackia_exigua	8.9091e-05	20	0.0455	0.000105909	25	0.318	RA	0.030495
	k__Bacteria|p__Firmicutes|c__Bacilli|o__Lactobacillales|f__Streptococcaceae|g__Streptococcus|s__Streptococcus_cristatus	0.00100091	18	0.955	0.00180818	27	1	RA	0.0388121
	k__Bacteria|p__Firmicutes|c__Bacilli|o__Lactobacillales|f__Streptococcaceae|g__Streptococcus|s__Streptococcus_gordonii	0.000595455	16	0.591	0.0062	29	0.864	RA	0.000638653
	k__Bacteria|p__Firmicutes|c__Bacilli|o__Lactobacillales|f__Streptococcaceae|g__Streptococcus|s__Streptococcus_mitis_oralis_pneumoniae	0.00453318	19	1	0.0693336	26	1	RA	0.0439659
	k__Bacteria|p__Firmicutes|c__Bacilli|o__Lactobacillales|f__Streptococcaceae|g__Streptococcus|s__Streptococcus_oligofermentans	0.000661818	18	0.864	0.00209455	27	0.955	RA	0.0366159
	k__Bacteria|p__Firmicutes|c__Bacilli|o__Lactobacillales|f__Streptococcaceae|g__Streptococcus|s__Streptococcus_peroris	0.000261818	17	0.545	0.00124318	28	0.818	RA	0.00867512
	k__Bacteria|p__Firmicutes|c__Bacilli|o__Lactobacillales|f__Streptococcaceae|g__Streptococcus|s__Streptococcus_tigurinus	0.000793182	18	0.682	0.00374409	27	0.864	RA	0.0213257
	k__Bacteria|p__Proteobacteria|c__Gammaproteobacteria|o__Aeromonadales|f__Succinivibrionaceae|g__Succinatimonas|s__Succinatimonas_hippei	0.0113332	18	0.5	0.0387423	27	0.773	RA	0.0119323
	k__Bacteria|p__Proteobacteria|c__Betaproteobacteria|o__Burkholderiales|f__Sutterellaceae|g__Sutterella|s__Sutterella_parvirubra	0.31401	18	0.409	0.864515	27	0.864	RA	0.0141386
	k__Bacteria|p__Firmicutes|c__Negativicutes|o__Selenomonadales|f__Veillonellaceae|g__Veillonella|s__Veillonella_dispar	0.00950454	18	0.909	0.0416432	27	1	RA	0.022099
	k__Bacteria|p__Firmicutes|c__Negativicutes|o__Selenomonadales|f__Veillonellaceae|g__Veillonella|s__Veillonella_unclassified	0.0182536	18	0.818	0.0818291	27	0.864	RA	0.0130918
	k__Bacteria|p__Proteobacteria|c__Gammaproteobacteria|o__Xanthomonadales|f__Xanthomonadaceae|g__Xanthomonas|s__Xanthomonas_gardneri	0.00303591	31	0.955	0.000324091	14	0.818	HC	1.71003e-05
	k__Bacteria|p__Proteobacteria|c__Gammaproteobacteria|o__Xanthomonadales|f__Xanthomonadaceae|g__Xanthomonas|s__Xanthomonas_perforans	0.360571	33	1	0.0704341	12	1	HC	1.90105e-12

## Sheet: Table S4
Table S4 Significant differences MetaCyc pathways between HC and RA.
Pathway ID	Definition	HC			RA			Enrichment	P value
		Mean relative abundance	Mean rank	Occurrence rate	Mean relative abundance	Mean rank	Occurrence rate
HEMESYN2_PWY	heme biosynthesis II (anaerobic)	0.000647271	18	1	0.00100544	27	1	RA	0.0210255
P163_PWY	L-lysine fermentation to acetate and butanoate	1.217e-05	25	0.227	0	20	0	HC	0.0202766
P164_PWY	purine nucleobases degradation I (anaerobic)	0.000377939	18	0.864	0.000548905	27	0.955	RA	0.0289825
P23_PWY	reductive TCA cycle I	6.8164e-05	17	0.409	0.00015737	28	0.864	RA	0.00162518
PWY_241	C4 photosynthetic carbon assimilation cycle, NADP-ME type	3.2781e-05	18	0.455	6.9991e-05	27	0.773	RA	0.0209431
PWY_5121	superpathway of geranylgeranyl diphosphate biosynthesis II (via MEP)	0.000712473	18	1	0.00096504	27	1	RA	0.023922
PWY_5791	1,4-dihydroxy-2-naphthoate biosynthesis II (plants)	0.000475423	19	0.909	0.00053313	26	1	RA	0.0473108
PWY_5837	1,4-dihydroxy-2-naphthoate biosynthesis I	0.000475423	19	0.909	0.00053313	26	1	RA	0.0473108
PWY_5897	superpathway of menaquinol-11 biosynthesis	0.00109969	19	0.909	0.0014131	26	1	RA	0.0447518
PWY_5898	superpathway of menaquinol-12 biosynthesis	0.00109969	19	0.909	0.0014131	26	1	RA	0.0447518
PWY_5899	superpathway of menaquinol-13 biosynthesis	0.00109969	19	0.909	0.0014131	26	1	RA	0.0447518
PWY_5910	superpathway of geranylgeranyldiphosphate biosynthesis I (via mevalonate)	2.999e-06	19	0.0909	1.4614e-05	26	0.364	RA	0.0308829
PWY_6936	seleno-amino acid biosynthesis	0.00184081	26	1	0.00138147	19	1	HC	0.0465721
PWY_7115	C4 photosynthetic carbon assimilation cycle, NAD-ME type	5.1954e-05	17	0.455	0.000109504	28	0.864	RA	0.00420949
PWY_7117	C4 photosynthetic carbon assimilation cycle, PEPCK type	4.3224e-05	17	0.455	0.000119746	28	0.864	RA	0.0036152
PWY_922	mevalonate pathway I	2.37e-06	18	0.0909	3.4228e-05	27	0.5	RA	0.00235509
PWY0_41	allantoin degradation IV (anaerobic)	3.0162e-05	27	0.864	1.7244e-05	18	0.545	HC	0.0191658
PWY66_389	phytol degradation	4.482e-05	27	0.773	2.0388e-05	18	0.455	HC	0.0115169

## Sheet: Table S5
Table S5 Significant differences bacterial species between baseline and different treatment time points in RA patients treated with HQT.
Species	M0			M1			M3			M6			Enrichment	P value
	Mean relative abundance	Mean rank	Occurrence rate	Mean relative abundance	Mean rank	Occurrence rate	Mean relative abundance	Mean rank	Occurrence rate	Mean relative abundance	Mean rank	Occurrence rate
k__Bacteria|p__Firmicutes|c__Clostridia|o__Clostridiales|f__Clostridiaceae|g__Clostridium|s__Clostridium_celatum	3.5385e-05	19	0.0769	0.000226154	27	0.462	0.00121923	26	0.308	0.151453	34	0.615	M6	0.0084
k__Bacteria|p__Firmicutes|c__Clostridia|o__Clostridiales|f__Clostridiaceae|g__Clostridium|s__Clostridium_symbiosum	0.0720577	33	0.923	0.0250354	27	0.846	0.0176292	26	0.923	0.00635769	19	0.846	M0	0.0172
k__Bacteria|p__Firmicutes|c__Clostridia|o__Clostridiales|f__Clostridiales_noname|g__Clostridiales_noname|s__Clostridiales_bacterium_1_7_47FAA	0.0447862	32	1	0.0250438	30	1	0.0122108	23	0.923	0.00993	21	1	M0	0.0408
k__Bacteria|p__Firmicutes|c__Clostridia|o__Clostridiales|f__Eubacteriaceae|g__Eubacteriaceae_noname|s__Eubacteriaceae_bacterium_ACC19a	6.6154e-05	30	0.308	0.00014	29	0.231	2.5385e-05	25	0.0769	0	22	0	M0	0.0268
k__Bacteria|p__Firmicutes|c__Clostridia|o__Clostridiales|f__Lachnospiraceae|g__Roseburia|s__Roseburia_inulinivorans	0.340068	18	1	0.91056	24	1	0.667889	27	1	2.14829	38	1	M6	0.0004
k__Bacteria|p__Firmicutes|c__Clostridia|o__Clostridiales|f__Ruminococcaceae|g__Subdoligranulum|s__Subdoligranulum_sp_4_3_54A2FAA	0.173435	30	0.231	0.0419646	28	0.154	0	24	0	0	24	0	M0	0.016
k__Bacteria|p__Firmicutes|c__Erysipelotrichia|o__Erysipelotrichales|f__Erysipelotrichaceae|g__Turicibacter|s__Turicibacter_sanguinis	0.00107615	18	0.692	0.00107	23	0.846	0.00940692	32	1	0.0225692	33	0.846	M6	0.0032
k__Bacteria|p__Firmicutes|c__Negativicutes|o__Selenomonadales|f__Veillonellaceae|g__Dialister|s__Dialister_succinatiphilus	0.000239231	23	0.0769	0.00123154	25	0.154	6.1538e-05	26	0.231	0.000267692	32	0.462	M6	0.0276
k__Bacteria|p__Fusobacteria|c__Fusobacteriia|o__Fusobacteriales|f__Fusobacteriaceae|g__Cetobacterium|s__Cetobacterium_somerae	0	21	0	0.000425385	23	0.0769	0.684618	29	0.308	0.00196077	33	0.462	M6	0.0012
k__Bacteria|p__Proteobacteria|c__Gammaproteobacteria|o__Pasteurellales|f__Pasteurellaceae|g__Haemophilus|s__Haemophilus_aegyptius	0	20	0	0.000706923	27	0.231	0.000656154	30	0.385	0.00211	29	0.308	M3	0.0296
k__Bacteria|p__Proteobacteria|c__Gammaproteobacteria|o__Pasteurellales|f__Pasteurellaceae|g__Pasteurella|s__Pasteurella_bettyae	0.000216154	21	0.308	0.00152769	26	0.462	0.000593077	26	0.538	0.00432615	33	0.615	M6	0.0316

## Sheet: Table S6
Table S6 Significant differences MetaCyc pathways between baseline and different treatment time points in RA patients treated with HQT.
Pathway ID	Definition	M0			M1			M3			M6			Enrichment	P value
		Mean relative abundance	Mean rank	Occurrence rate	Mean relative abundance	Mean rank	Occurrence rate	Mean relative abundance	Mean rank	Occurrence rate	Mean relative abundance	Mean rank	Occurrence rate
ILEUSYN_PWY	L-isoleucine biosynthesis I (from threonine)	0.0130434	20	1	0.0143701	25	1	0.0145054	28	1	0.0154632	33	1	M6	0.0228
P161_PWY	acetylene degradation	0.000563662	31	1	0.000600823	30	1	0.000494169	24	1	0.000362157	21	1	M0	0.0424
PWY_5138	unsaturated, even numbered fatty acid &beta;-oxidation	7.8665e-05	30	0.846	6.0929e-05	32	1	5.7607e-05	25	0.692	1.7045e-05	19	0.538	M1	0.022
PWY_5676	acetyl-CoA fermentation to butanoate II	0.00136039	34	1	0.00110584	27	1	0.00109136	25	1	0.000934889	20	1	M0	0.0152
PWY_6353	purine nucleotides degradation II (aerobic)	0.00134201	30	1	0.00126309	29	1	0.00125723	28	1	0.000896204	18	1	M0	0.046
PWY_7111	pyruvate fermentation to isobutanol (engineered)	0.0130434	20	1	0.0143701	25	1	0.0145054	28	1	0.0154632	33	1	M6	0.0256
PWY_7294	xylose degradation IV	0	24	0	0	24	0	1.3501e-05	27	0.0769	2.935e-06	30	0.231	M6	0.032
PWY0_1297	superpathway of purine deoxyribonucleosides degradation	0.00139046	33	1	0.00128389	28	1	0.00128463	26	1	0.000919391	19	1	M0	0.0264
VALSYN_PWY	L-valine biosynthesis	0.0130434	20	1	0.0143701	25	1	0.0145054	28	1	0.0154632	33	1	M6	0.0224

## Sheet: Table S7
Table S7 Correlation of clinical indicators, gut microbiome species and the gut microbiome functional pathway
Correlation of gut microbiome species and the gut microbiome functional pathway (Map.FDR.0.05.heatmap.qvalue)
	s__Odoribacter_laneus	s__Enterococcus_faecalis	s__Enterococcus_faecium	s__Erysipelotrichaceae_bacterium_3_1_53	s__Acidaminococcus_intestini	s__Selenomonas_noxia	s__Fusobacterium_varium	s__Eikenella_corrodens	s__Neisseria_meningitidis	s__Xanthomonas_gardneri	s__Xanthomonas_perforans
map00051	0.995761	0.0172624	0.0142855	0.18299	0.157053	0.973169	0.60406	0.587802	0.0368052	0.0126814	0.0109196
map00052	0.325542	0.459487	0.46456	0.510598	0.0924155	0.982	0.218679	0.788027	0.614003	0.593844	0.148387
map00520	0.000349464	0.404966	0.785391	0.301255	0.968682	0.512486	0.977532	0.796848	0.98721	0.936659	0.69958
map00400	0.732257	0.481747	0.558379	0.533501	0.208685	0.312326	0.575415	0.138841	0.762538	0.0970545	0.355701
map00630	0.879784	0.0477869	0.0861662	0.152806	0.0266001	0.252801	0.0649089	0.189021	0.0718127	0.137487	0.0518205
map00680	0.00334547	0.161967	0.155663	0.00184525	3.78e-08	1.88e-06	0.753782	0.0135605	0.00167131	0.500405	0.181184
map02020	0.155819	0.760377	0.736758	0.47286	0.54948	0.347017	0.538401	0.93776	0.618735	0.00940096	0.0369592
map00360	0.144803	0.0178817	0.00766096	0.0155003	0.00774906	0.0368974	0.00179626	0.00825928	0.00106338	0.724549	0.0843175
map00550	0.751379	0.220971	0.396092	0.410872	0.0313396	0.486679	0.964769	0.251748	0.275112	0.00830744	0.11699
map00250	0.366494	0.235952	0.710748	0.210969	0.376894	0.185746	0.155495	0.548284	0.0625823	0.529216	0.229661
map00190	0.821874	0.138041	0.0242866	0.54354	0.281876	0.947268	0.0905269	0.674604	0.83332	0.00520521	0.157678
map00670	0.909467	0.025233	0.164605	0.0372597	0.280954	0.254247	0.0209403	0.633855	0.00985862	0.000568548	0.0144455
map02030	0.546028	0.511993	0.0238196	0.909576	0.978595	0.98686	0.866807	0.690135	0.893174	0.514332	0.154542
map00970	0.00060264	0.811895	0.903414	0.938075	0.919787	0.777851	0.839027	0.639243	0.774913	0.243693	0.340337
map00540	0.423268	0.973169	0.881725	0.916588	0.923887	0.195089	0.731722	0.614136	0.147787	0.476516	0.218479
map01503	0.0297283	0.845343	0.780243	0.847257	0.632374	0.588083	0.827021	0.788938	0.376293	0.242481	0.089835
map00500	0.000176747	0.255925	0.490754	0.785317	0.794988	0.0744658	0.439693	0.0610383	0.647457	0.845874	0.831693
map01502	0.453835	0.629538	0.367379	0.614314	0.0729346	0.394205	0.751245	0.894384	0.304573	0.204527	0.00762488
map05150	0.785317	0.0122146	0.0236231	0.0070461	0.488881	0.0440564	0.162922	0.00526837	0.362034	0.158682	0.0292472
map03010	3.41e-07	0.583361	0.01086	0.515585	8.67e-07	3.11e-05	0.951518	0.802558	0.00223412	0.49472	0.380359
map02010	0.425549	0.00732377	0.00303418	0.0193012	0.165714	5.63e-08	0.0786404	0.011096	0.00152353	8.27e-05	0.000597636
map00195	0.283971	0.0413362	0.0640142	0.0227757	0.652813	0.092885	0.000703061	0.157686	0.927621	9.32e-05	0.00284282
map02040	0.41178	0.0069034	5.45e-08	0.106684	0.676032	0.628949	0.331159	0.0325212	0.980188	0.00911575	2.39e-06
map05132	0.0240906	0.00599548	0.00888087	0.00215388	6.85e-06	0.00134384	0.000529139	0.817666	0.000118092	0.118784	0.000121554
Correlation of gut microbiome species and the gut microbiome functional pathway (Map.FDR.0.05.heatmap.SCC)
	s__Odoribacter_laneus	s__Enterococcus_faecalis	s__Enterococcus_faecium	s__Erysipelotrichaceae_bacterium_3_1_53	s__Acidaminococcus_intestini	s__Selenomonas_noxia	s__Fusobacterium_varium	s__Eikenella_corrodens	s__Neisseria_meningitidis	s__Xanthomonas_gardneri	s__Xanthomonas_perforans
map00051	-0.0126507	0.117348	0.0939407	0.0563183	0.0372295	0.00565797	0.0311833	-0.0297485	-0.0786046	0.124058	0.0667693
map00052	0.0569105	0.0703663	0.041653	0.0344485	0.0552201	-0.00167644	0.0517615	-0.00164197	-0.019627	0.0499339	0.0653108
map00520	0.124218	-0.0407657	-0.0238595	-0.0184856	-0.000386961	-0.0504999	0.0140936	0.0223336	-0.00374249	0.0194109	0.0113251
map00400	0.0580917	0.053356	0.0449454	0.0744667	0.0678638	0.0827741	0.0697979	0.0637073	-0.00542887	0.134763	0.0406582
map00630	-0.015772	0.0845224	0.0866656	0.0718405	0.0514844	-0.0669803	0.0645014	-0.0783143	-0.0591046	0.0602906	0.0743862
map00680	0.116827	-0.0331231	-0.0318932	-0.105746	-0.130831	-0.158094	-0.00944362	-0.0747943	0.105391	0.0285776	-0.0593955
map02020	-0.0358399	-0.0102687	-0.00241695	-0.0111426	-0.0127593	0.0149169	-0.0116108	0.0118543	0.00898232	-0.0408289	-0.0464209
map00360	-0.0857868	0.178566	0.1418	0.16818	0.125659	-0.0977365	0.148186	-0.144033	-0.158294	0.0463614	0.0942682
map00550	0.0265019	0.0490279	0.0432727	0.0615798	0.10298	0.0337383	-0.0146126	0.02859	-0.0493555	0.19908	0.067682
map00250	0.118981	0.0948086	0.0478698	0.0965883	0.00881391	-0.0586726	0.0792323	-0.0337207	-0.0706458	0.0651898	0.0514404
map00190	0.0338375	0.0644285	0.0596435	0.0300838	0.0727626	0.0071029	0.0887967	0.0223855	-0.0113927	0.0975855	0.0629968
map00670	-0.022635	0.195082	0.109423	0.175228	0.109508	-0.0737632	0.175986	-0.0196629	-0.128983	0.206214	0.102759
map02030	0.0474227	0.0901408	0.129036	0.0193374	0.0122403	0.0289185	0.0359809	-0.0348289	0.0212377	0.0666829	0.0632317
map00970	0.187298	-0.0474442	-0.00354282	-0.0383956	0.0251678	-0.00796308	0.00481018	0.0444784	-0.0238466	0.0833644	0.0661211
map00540	-0.0382902	-0.022151	0.0468261	-0.0363186	0.0110689	0.101788	-0.0488409	0.0467807	0.07625	0.0224124	-0.113536
map01503	-0.0952961	0.0180267	-0.02345	0.0327474	-0.0357805	0.0247976	0.00744677	-0.0309611	0.0389234	-0.0837101	-0.0674912
map00500	0.135722	-0.0529095	-0.0257986	-0.018007	0.0238467	0.0642808	-0.0596576	0.0514039	0.0352493	-0.0226566	0.0150952
map01502	0.11735	0.0287052	0.0947232	0.0204569	0.12759	-0.00817263	-0.0623388	0.0100792	-0.0804627	0.166383	0.146017
map05150	-0.0345939	-0.28215	-0.22058	-0.264632	-0.100994	0.21495	-0.161271	0.320364	0.0605153	-0.144762	-0.262536
map03010	0.169031	0.024652	-0.0639861	-0.0385797	-0.139299	-0.170021	0.00199042	-0.0074556	-0.0405623	0.0208358	0.0459957
map02010	-0.0342475	-0.0424703	-0.0427686	-0.0650695	-0.0276584	0.0631763	-0.0317631	0.0405662	0.0520975	-0.0384443	-0.0479702
map00195	0.0643508	0.133527	0.2488	0.147742	0.0625645	0.0857072	0.194569	0.0559321	0.00793809	0.43037	0.210465
map02040	0.0871623	0.116887	0.1663	0.0852282	0.0215417	-0.0217909	0.0623775	-0.0794904	-0.0069992	0.142268	0.16696
map05132	0.248026	-0.258361	-0.224703	-0.241013	-0.265549	0.226662	-0.305117	0.064656	0.290124	-0.0937348	-0.306938
Correlation of clinical indicators and gut microbiome species (Map.metlip.phenotype.heatmap.FDR.0.05.qvalue)
	Age_q.value	BMI_q.value	WBC_q.value	HB_q.value	PLT_q.value	ALT_q.value	AST_q.value	BUN_q.value	CR_q.value	ESR_q.value	CRP_q.value	RF_q.value	Anti-CCP_q.value	Age_Add.adj.partial_q.value	BMI_Add.adj.partial_q.value	WBC_Add.adj.partial_q.value	HB_Add.adj.partial_q.value	PLT_Add.adj.partial_q.value	ALT_Add.adj.partial_q.value	AST_Add.adj.partial_q.value	BUN_Add.adj.partial_q.value	CR_Add.adj.partial_q.value	ESR_Add.adj.partial_q.value	CRP_Add.adj.partial_q.value	RF_Add.adj.partial_q.value	Anti-CCP_Add.adj.partial_q.value
s__Odoribacter_laneus	0.717708	0.663985	0.604395	0.921248	0.835292	0.831742	0.916511	0.990933	0.896461	0.477152	0.00650455	0.717708	0.989837	0.741815	0.691605	0.635546	0.927866	0.850359	0.847069	0.923546	0.991757	0.906057	0.512147	0.00836109	0.741815	0.990782
s__Enterococcus_faecalis	0.908198	0.767185	0.898937	0.825937	0.680723	0.621229	0.35691	0.898937	0.745064	0.124331	0.265247	0.017345	0.00677198	0.915638	0.787151	0.907215	0.841577	0.706904	0.651366	0.392449	0.907215	0.766953	0.14571	0.300515	0.0215751	0.00868077
s__Enterococcus_faecium	0.931249	0.90932	0.775601	0.809707	0.778121	0.860311	0.36201	0.921679	0.956264	0.505821	0.172009	0.0153359	0.200623	0.937325	0.916636	0.795094	0.8272	0.797552	0.872946	0.396584	0.928248	0.960147	0.538563	0.198333	0.0191577	0.22993
s__Erysipelotrichaceae_bacterium_3_1_53	0.988283	0.775601	0.669356	0.897368	0.775601	0.563655	0.00916293	0.903773	0.763182	0.00792343	0.0101756	9.45968e-06	3.42344e-05	0.989679	0.795094	0.696401	0.906681	0.795094	0.595799	0.0116225	0.911539	0.783568	0.0101014	0.0128555	1.49351e-05	5.1846e-05
s__Acidaminococcus_intestini	0.90153	0.455686	0.977776	0.969439	0.915547	0.564723	0.452907	0.957193	0.996966	0.757541	0.346012	0.268481	0.0360512	0.909472	0.490815	0.979909	0.972099	0.922663	0.596694	0.488296	0.960879	0.99716	0.778287	0.381776	0.303244	0.0439561
s__Selenomonas_noxia	0.883791	0.982223	0.790683	0.85779	0.680361	0.534475	0.00195785	0.440056	0.896461	0.758412	0.492786	0.461302	0.4053	0.894993	0.983887	0.809814	0.870819	0.706549	0.567383	0.00262182	0.475884	0.906057	0.779093	0.527355	0.496592	0.441793
s__Fusobacterium_varium	0.94261	0.835292	0.809086	0.767415	0.639419	0.979572	0.41643	0.767415	0.967796	0.063133	0.191829	0.000133086	0.00103278	0.947589	0.850359	0.826748	0.787151	0.668486	0.981438	0.452614	0.787151	0.970627	0.0756347	0.220186	0.000192516	0.00141464
s__Eikenella_corrodens	0.998265	0.741074	0.870918	0.804311	0.898937	0.619625	0.00650455	0.767415	0.780418	0.672035	0.464999	0.333481	0.35691	0.998368	0.763855	0.882768	0.822288	0.907215	0.649945	0.00836109	0.787151	0.799826	0.698714	0.500248	0.369873	0.392449
s__Neisseria_meningitidis	0.884256	0.789669	0.860783	0.430501	0.491539	0.583594	0.00271378	0.600399	0.793957	0.292128	0.469268	0.304295	0.151708	0.895349	0.808845	0.87308	0.466876	0.526137	0.615401	0.00358586	0.631891	0.812802	0.328582	0.503966	0.341165	0.175725
s__Xanthomonas_gardneri	0.883791	0.973224	0.938568	0.960431	0.959644	0.743639	0.410411	0.989837	0.996966	0.483177	0.35691	0.00221732	0.00476898	0.894993	0.975627	0.944121	0.963981	0.963236	0.766394	0.446519	0.990782	0.99716	0.517617	0.392449	0.00295183	0.00620147
s__Xanthomonas_perforans	0.897368	0.896461	0.505821	0.855014	0.505821	0.739615	0.0196413	0.737299	0.829283	0.134996	0.0019511	5.72715e-05	3.88948e-06	0.906681	0.906057	0.538563	0.86835	0.538563	0.762587	0.0243284	0.760496	0.844723	0.157785	0.00262151	8.50418e-05	6.38499e-06
Correlation of clinical indicators and the gut microbiome functional pathway (Map.module.phenotype.heatmap.FDR.0.05.qvalue)
	Age_q.value	BMI_q.value	WBC_q.value	HB_q.value	PLT_q.value	ALT_q.value	AST_q.value	BUN_q.value	CR_q.value	ESR_q.value	CRP_q.value	RF_q.value	Anti-CCP_q.value	Age_Add.adj.partial_q.value	BMI_Add.adj.partial_q.value	WBC_Add.adj.partial_q.value	HB_Add.adj.partial_q.value	PLT_Add.adj.partial_q.value	ALT_Add.adj.partial_q.value	AST_Add.adj.partial_q.value	BUN_Add.adj.partial_q.value	CR_Add.adj.partial_q.value	ESR_Add.adj.partial_q.value	CRP_Add.adj.partial_q.value	RF_Add.adj.partial_q.value	Anti-CCP_Add.adj.partial_q.value
map00051	0.791388	0.234647	0.928391	0.911721	0.406588	0.0477778	0.384418	0.140589	0.536719	0.0948688	0.0838317	0.137418	0.0303995	0.791388	0.234647	0.928391	0.911721	0.406588	0.0477778	0.384418	0.140589	0.536719	0.0948688	0.0838317	0.137418	0.0303995
map00052	0.543901	0.191421	0.679307	0.333296	0.97387	0.788705	0.62262	0.0694297	0.145091	0.268729	0.0150522	0.0730521	0.217113	0.543901	0.191421	0.679307	0.333296	0.97387	0.788705	0.62262	0.0694297	0.145091	0.268729	0.0150522	0.0730521	0.217113
map00520	0.346028	0.673086	0.119844	0.119844	0.623106	0.852225	0.0719158	0.218701	0.000654469	0.899529	0.00385076	0.939345	0.952125	0.346028	0.673086	0.119844	0.119844	0.623106	0.852225	0.0719158	0.218701	0.000654469	0.899529	0.00385076	0.939345	0.952125
map00400	0.00940207	0.623106	0.213671	0.90969	0.84358	0.476598	0.908037	0.00874236	0.0948688	0.357399	0.0219599	0.500285	0.289379	0.00940207	0.623106	0.213671	0.90969	0.84358	0.476598	0.908037	0.00874236	0.0948688	0.357399	0.0219599	0.500285	0.289379
map00630	0.806247	0.177948	0.643552	0.609941	0.461499	0.608539	0.294921	0.981331	0.937435	0.218672	0.339883	0.218672	0.0483938	0.806247	0.177948	0.643552	0.609941	0.461499	0.608539	0.294921	0.981331	0.937435	0.218672	0.339883	0.218672	0.0483938
map00680	0.00263264	2.64444e-08	0.105292	1.67105e-05	0.607869	0.033041	0.254003	0.001555	0.345442	0.000135408	0.868197	0.123401	0.0183631	0.00263264	2.64444e-08	0.105292	1.67105e-05	0.607869	0.033041	0.254003	0.001555	0.345442	0.000135408	0.868197	0.123401	0.0183631
map02020	0.266392	0.643189	0.00292371	0.211802	0.734607	0.806247	0.84358	0.523366	0.0410716	0.451337	0.00133185	0.310522	0.191081	0.266392	0.643189	0.00292371	0.211802	0.734607	0.806247	0.84358	0.523366	0.0410716	0.451337	0.00133185	0.310522	0.191081
map00360	0.143389	0.699231	0.0650574	0.0196585	0.254003	0.80048	0.00575247	0.0986576	0.0142017	0.0719158	0.84358	0.0110653	0.00724387	0.143389	0.699231	0.0650574	0.0196585	0.254003	0.80048	0.00575247	0.0986576	0.0142017	0.0719158	0.84358	0.0110653	0.00724387
map00550	0.0253775	0.712854	0.268729	0.451337	0.902728	0.00134689	0.840733	0.000969295	0.0151549	0.0303995	0.001555	0.291632	0.212958	0.0253775	0.712854	0.268729	0.451337	0.902728	0.00134689	0.840733	0.000969295	0.0151549	0.0303995	0.001555	0.291632	0.212958
map00250	0.234647	0.0318783	0.230455	0.92396	0.232122	0.358465	0.761825	0.384418	0.379956	0.0223532	0.0202846	0.567513	0.384418	0.234647	0.0318783	0.230455	0.92396	0.232122	0.358465	0.761825	0.384418	0.379956	0.0223532	0.0202846	0.567513	0.384418
map00190	0.000647811	0.545455	0.13189	0.984779	0.140589	0.653432	0.692528	0.0262294	0.0331598	0.567513	0.0562761	0.29427	0.0262294	0.000647811	0.545455	0.13189	0.984779	0.140589	0.653432	0.692528	0.0262294	0.0331598	0.567513	0.0562761	0.29427	0.0262294
map00670	0.119844	0.849783	0.0303995	0.817823	0.113806	0.102244	0.227497	0.186365	0.408499	0.0533498	0.0476798	0.225896	0.0265124	0.119844	0.849783	0.0303995	0.817823	0.113806	0.102244	0.227497	0.186365	0.408499	0.0533498	0.0476798	0.225896	0.0265124
map02030	0.00225497	0.461499	0.0883128	0.696937	0.635576	0.0341728	0.534242	0.733453	0.938286	0.0170243	0.33107	0.00982262	0.345615	0.00225497	0.461499	0.0883128	0.696937	0.635576	0.0341728	0.534242	0.733453	0.938286	0.0170243	0.33107	0.00982262	0.345615
map00970	0.0660587	0.87798	0.0562761	0.0160736	0.655767	0.266059	0.258809	0.479097	9.77132e-05	0.0450114	0.0002543	0.984351	0.882217	0.0660587	0.87798	0.0562761	0.0160736	0.655767	0.266059	0.258809	0.479097	9.77132e-05	0.0450114	0.0002543	0.984351	0.882217
map00540	0.968422	0.213111	0.291632	0.384112	0.544666	0.477113	0.86966	0.384418	0.566463	0.230457	0.037597	0.230455	0.358071	0.968422	0.213111	0.291632	0.384112	0.544666	0.477113	0.86966	0.384418	0.566463	0.230457	0.037597	0.230455	0.358071
map01503	0.0476798	0.316191	0.00874236	0.0222317	0.661968	0.899143	0.395634	0.0500986	0.00727816	0.0946128	0.000969295	0.394571	0.472369	0.0476798	0.316191	0.00874236	0.0222317	0.661968	0.899143	0.395634	0.0500986	0.00727816	0.0946128	0.000969295	0.394571	0.472369
map00500	0.00205287	0.274168	0.12367	0.000485614	0.0101842	0.652988	0.00595603	0.00263264	0.00041571	0.333296	0.00575247	0.831978	0.950645	0.00205287	0.274168	0.12367	0.000485614	0.0101842	0.652988	0.00595603	0.00263264	0.00041571	0.333296	0.00575247	0.831978	0.950645
map01502	0.0984032	0.640301	0.00196015	0.168067	0.0588504	0.39355	0.812915	0.395634	0.230455	0.577574	0.0134191	0.601308	0.250149	0.0984032	0.640301	0.00196015	0.168067	0.0588504	0.39355	0.812915	0.395634	0.230455	0.577574	0.0134191	0.601308	0.250149
map05150	0.254003	0.234647	0.898997	0.137418	0.0913521	0.637198	0.0171476	0.217113	0.0562761	0.105356	0.290493	0.0230043	0.0407773	0.254003	0.234647	0.898997	0.137418	0.0913521	0.637198	0.0171476	0.217113	0.0562761	0.105356	0.290493	0.0230043	0.0407773
map03010	0.588218	0.286151	0.234233	0.425912	0.463243	4.81371e-08	0.907482	0.00575247	0.00856354	4.92073e-06	0.00920395	0.106799	0.323645	0.588218	0.286151	0.234233	0.425912	0.463243	4.81371e-08	0.907482	0.00575247	0.00856354	4.92073e-06	0.00920395	0.106799	0.323645
map02010	0.587207	0.284777	0.451337	0.339883	0.00292371	0.00041571	0.00041571	0.187676	0.918045	0.563585	0.0450114	0.160389	0.0331598	0.587207	0.284777	0.451337	0.339883	0.00292371	0.00041571	0.00041571	0.187676	0.918045	0.563585	0.0450114	0.160389	0.0331598
map00195	0.000385128	0.655712	0.218672	0.649664	0.806247	0.290493	0.601038	0.000139326	0.000840525	6.37905e-06	2.8114e-06	0.000139326	0.000118461	0.000385128	0.655712	0.218672	0.649664	0.806247	0.290493	0.601038	0.000139326	0.000840525	6.37905e-06	2.8114e-06	0.000139326	0.000118461
map02040	5.79642e-14	0.566463	0.0006669	0.694887	0.476598	0.000969295	0.00132331	0.2663	0.463243	2.27227e-06	0.0277686	1.49501e-09	0.000341579	5.79642e-14	0.566463	0.0006669	0.694887	0.476598	0.000969295	0.00132331	0.2663	0.463243	2.27227e-06	0.0277686	1.49501e-09	0.000341579
map05132	0.887537	0.339883	0.564262	0.128307	0.846222	0.655767	0.143389	0.856645	0.655712	0.00283314	0.0303995	0.000173971	1.13853e-05	0.88747	0.339883	0.564262	0.128307	0.846222	0.655767	0.143389	0.856645	0.655712	0.00283314	0.0303995	0.000173971	1.13853e-05

## Sheet: Table S8
Table S8 Species number and alpha diversity between HC and RA samples
	Species.number	Shannon.index
C01	91	1.98987
C02	103	3.15888
C03	89	2.10499
C04	100	3.01348
C05	101	2.95861
C06	117	2.83273
C07	96	2.73932
C08	64	1.48341
C09	113	3.28744
C10	104	2.42505
C11	98	2.7619
C12	94	2.45682
C13	102	2.86913
C14	77	2.42311
C15	100	3.42544
C16	95	3.20707
C17	91	2.65566
C18	89	2.17251
C19	89	2.71509
C20	116	3.09855
C21	126	2.91565
C22	90	1.87259
S01.M0	111	3.14073
S01.M12	92	2.52775
S01.M1	101	2.29143
S01.M3	90	2.92144
S01.M6	84	2.98752
S02.M0	109	3.64001
S02.M1	106	2.9422
S02.M3	102	3.12364
S02.M6	110	2.85355
S03.M0	81	2.66903
S03.M1	95	3.08626
S03.M3	77	2.40676
S03.M6	96	2.85447
S04.M0	71	0.543181
S04.M1	47	1.30158
S04.M3	82	1.73431
S04.M6	122	2.75857
S05.M0	67	2.04274
S05.M1	93	2.85259
S05.M3	84	2.11587
S05.M6	86	2.40877
S06.M0	105	3.15862
S06.M1	120	3.29807
S06.M3	98	2.95279
S06.M6	115	3.0141
S07.M0	94	2.91167
S07.M12	104	2.90161
S07.M1	125	3.00465
S07.M3	100	2.70288
S07.M6	97	3.24994
S08.M0	93	2.28054
S08.M1	103	2.25306
S08.M3	105	2.27866
S08.M6	101	1.38216
S09.M0	100	2.88052
S09.M12	112	3.28297
S09.M1	112	3.23976
S09.M3	119	3.35344
S09.M6	105	3.07302
S10.M0	122	2.9219
S10.M12	85	2.7826
S10.M1	108	2.88367
S10.M3	102	2.89254
S10.M6	95	2.75675
S11.M0	116	3.1669
S11.M12	113	2.86033
S11.M1	119	3.0817
S11.M3	130	3.11053
S11.M6	121	2.5204
S12.M0	87	2.48352
S12.M1	81	2.34312
S12.M3	93	2.88311
S12.M6	112	2.55626
S13.M0	108	2.57945
S13.M1	112	3.06668
S13.M3	86	2.32608
S13.M6	88	2.26947
S14.M0	121	3.26054
S14.M12	102	2.64438
S14.M1	105	3.12505
S14.M3	112	3.08637
S14.M6	91	3.03725
S15.M0	91	2.76665
S15.M1	115	2.81991
S15.M3	106	2.69857
S15.M6	111	2.98293
S16.M0	103	2.87994
S16.M1	96	2.878
S16.M3	49	1.81837
S16.M6	90	1.84839
S17.M0	105	2.91931
S17.M1	110	3.45738
S17.M3	100	3.11205
S17.M6	108	3.25763
S18.M0	62	2.60048
S18.M1	44	2.4467
S18.M3	63	2.52063
S18.M6	82	2.9347
S19.M0	106	2.19495
S19.M1	95	2.0258
S19.M3	95	2.40603
S19.M6	105	2.65175
S20.M0	120	2.76988
S20.M1	127	2.86241
S20.M3	131	3.05428
S20.M6	112	3.33583
S21.M0	94	1.69612
S21.M1	94	1.75944
S21.M3	104	1.90184
S21.M6	102	1.81885
S22.M0	88	1.83145
S22.M12	83	1.55877
S22.M1	93	2.37328
S22.M3	88	2.02674
S22.M6	107	2.67059

## Sheet: Table S9
Table S9 PCoA based on the Bray-Curtis distance on gene family level between HC and RA
	C01	C02	C03	C04	C05	C06	C07	C08	C09	C10	C11	C12	C13	C14	C15	C16	C17	C18	C19	C20	C21	C22	S01.M0	S02.M0	S03.M0	S04.M0	S05.M0	S06.M0	S07.M0	S08.M0	S09.M0	S10.M0	S11.M0	S12.M0	S13.M0	S14.M0	S15.M0	S16.M0	S17.M0	S18.M0	S19.M0	S20.M0	S21.M0	S22.M0
C01	0	0.835986	0.774785	0.766665	0.675953	0.742754	0.837556	0.699976	0.757493	0.868926	0.708158	0.653047	0.75499	0.780251	0.78646	0.758249	0.821561	0.672598	0.706084	0.797446	0.844515	0.801999	0.763378	0.762314	0.680189	0.891902	0.70829	0.770367	0.674521	0.879971	0.764456	0.679439	0.664074	0.670379	0.890304	0.718065	0.692958	0.755851	0.747677	0.754447	0.865275	0.822971	0.877235	0.870997
C02	0.835986	0	0.831476	0.636926	0.692978	0.782944	0.713058	0.903448	0.71109	0.80207	0.81103	0.752202	0.691765	0.884162	0.662571	0.686673	0.824381	0.835514	0.806701	0.7573	0.787033	0.826786	0.734797	0.577893	0.715845	0.952296	0.842982	0.663116	0.645412	0.846892	0.681709	0.767892	0.682398	0.824323	0.830685	0.643634	0.762645	0.765232	0.731102	0.848223	0.830476	0.761992	0.871436	0.849329
C03	0.774785	0.831476	0	0.697636	0.638578	0.619774	0.634126	0.724056	0.707704	0.877204	0.651042	0.719414	0.692134	0.741029	0.719402	0.654551	0.675651	0.643045	0.679837	0.642389	0.735657	0.536105	0.778986	0.770587	0.613214	0.949754	0.827347	0.773382	0.69044	0.635126	0.690413	0.652878	0.671873	0.616569	0.63656	0.789694	0.655801	0.630864	0.696053	0.650775	0.613277	0.629679	0.627119	0.576229
C04	0.766665	0.636926	0.697636	0	0.635645	0.656461	0.62648	0.788474	0.603364	0.760387	0.674262	0.615981	0.661343	0.784141	0.60696	0.581804	0.663342	0.736471	0.713735	0.600981	0.77653	0.769179	0.665859	0.592368	0.635103	0.948646	0.704644	0.664078	0.580347	0.816786	0.578743	0.629433	0.604665	0.656091	0.792535	0.524387	0.657513	0.642807	0.624381	0.734605	0.763647	0.737741	0.815922	0.790211
C05	0.675953	0.692978	0.638578	0.635645	0	0.599398	0.778968	0.732951	0.611532	0.788124	0.55109	0.593556	0.522012	0.674691	0.575256	0.515953	0.64698	0.574775	0.600674	0.61557	0.775077	0.736116	0.637757	0.594808	0.536685	0.914751	0.783089	0.670767	0.473235	0.807934	0.576542	0.57995	0.489386	0.502996	0.799687	0.671659	0.456142	0.572488	0.583548	0.594403	0.789334	0.776164	0.803388	0.787076
C06	0.742754	0.782944	0.619774	0.656461	0.599398	0	0.779107	0.669348	0.668938	0.797104	0.647788	0.667465	0.69378	0.695919	0.701683	0.647644	0.537763	0.56691	0.641618	0.531604	0.827216	0.757827	0.731518	0.728966	0.683676	0.910743	0.720428	0.763743	0.608393	0.823774	0.685805	0.63831	0.638293	0.627621	0.841734	0.724948	0.631981	0.622992	0.699335	0.576413	0.774708	0.765954	0.836707	0.796623
C07	0.837556	0.713058	0.634126	0.62648	0.778968	0.779107	0	0.909205	0.727728	0.829003	0.805455	0.715713	0.723042	0.907356	0.710016	0.692537	0.791621	0.857461	0.812122	0.764826	0.809576	0.565193	0.772071	0.681453	0.749901	0.966262	0.856062	0.705749	0.726908	0.520163	0.700237	0.797763	0.640799	0.817468	0.56341	0.612634	0.797601	0.824665	0.736021	0.819089	0.530047	0.463141	0.528383	0.589251
C08	0.699976	0.903448	0.724056	0.788474	0.732951	0.669348	0.909205	0	0.812095	0.907058	0.759605	0.653693	0.80922	0.698689	0.874884	0.815449	0.734316	0.620438	0.711103	0.753562	0.901328	0.853391	0.908495	0.873643	0.823106	0.938314	0.727406	0.891405	0.807452	0.915194	0.837097	0.790287	0.790251	0.742668	0.931496	0.818162	0.778652	0.714781	0.844588	0.674035	0.918248	0.896818	0.923349	0.902079
C09	0.757493	0.71109	0.707704	0.603364	0.611532	0.668938	0.727728	0.812095	0	0.671908	0.700158	0.632214	0.639577	0.763618	0.667083	0.618665	0.721909	0.687618	0.67444	0.650574	0.750911	0.723475	0.697161	0.636013	0.640043	0.798404	0.724501	0.69466	0.615822	0.804666	0.62387	0.696846	0.608354	0.690908	0.798075	0.60291	0.655067	0.674275	0.659147	0.725217	0.80522	0.730537	0.852289	0.792441
C10	0.868926	0.80207	0.877204	0.760387	0.788124	0.797104	0.829003	0.907058	0.671908	0	0.854331	0.839844	0.800813	0.857865	0.804502	0.799088	0.810701	0.862384	0.876426	0.787939	0.881906	0.890972	0.741211	0.746216	0.843431	0.715951	0.859334	0.773429	0.786039	0.890055	0.806908	0.832561	0.780201	0.881033	0.88311	0.779411	0.845783	0.855188	0.839914	0.903738	0.85935	0.850857	0.917421	0.867504
C11	0.708158	0.81103	0.651042	0.674262	0.55109	0.647788	0.805455	0.759605	0.700158	0.854331	0	0.706027	0.643256	0.532407	0.662454	0.636057	0.675655	0.581572	0.62475	0.632938	0.847576	0.773271	0.61434	0.729007	0.650344	0.907592	0.731395	0.716405	0.599676	0.809379	0.648487	0.554584	0.626771	0.505158	0.85891	0.789334	0.559061	0.48753	0.609801	0.570975	0.786478	0.822903	0.800146	0.83999
C12	0.653047	0.752202	0.719414	0.615981	0.593556	0.667465	0.715713	0.653693	0.632214	0.839844	0.706027	0	0.669157	0.784921	0.693886	0.606975	0.674792	0.691294	0.525856	0.684605	0.818748	0.686247	0.77686	0.672774	0.645162	0.93266	0.581322	0.733874	0.584004	0.800983	0.627298	0.682048	0.542812	0.659352	0.814771	0.504327	0.606131	0.698007	0.633065	0.570612	0.807117	0.731849	0.807061	0.786387
C13	0.75499	0.691765	0.692134	0.661343	0.522012	0.69378	0.723042	0.80922	0.639577	0.800813	0.643256	0.669157	0	0.816053	0.477546	0.483504	0.734007	0.736241	0.708648	0.68331	0.757645	0.744252	0.672415	0.636115	0.550732	0.940468	0.840369	0.709013	0.554417	0.810794	0.572604	0.621934	0.576504	0.661161	0.798304	0.652581	0.568234	0.669343	0.639102	0.668441	0.789498	0.738634	0.795952	0.766856
C14	0.780251	0.884162	0.741029	0.784141	0.674691	0.695919	0.907356	0.698689	0.763618	0.857865	0.532407	0.784921	0.816053	0	0.817934	0.791716	0.702838	0.653691	0.742971	0.702775	0.90566	0.843007	0.783581	0.821295	0.774911	0.916807	0.772638	0.79403	0.718588	0.905797	0.801758	0.669356	0.776222	0.665544	0.915929	0.8538	0.70685	0.52818	0.738813	0.672716	0.889033	0.91619	0.898042	0.887796
C15	0.78646	0.662571	0.719402	0.60696	0.575256	0.701683	0.710016	0.874884	0.667083	0.804502	0.662454	0.693886	0.477546	0.817934	0	0.501907	0.723254	0.744963	0.724392	0.691807	0.766385	0.751343	0.676132	0.60884	0.576805	0.950749	0.83735	0.679658	0.561704	0.800915	0.58479	0.645016	0.606996	0.682008	0.764789	0.64486	0.597741	0.692904	0.608441	0.709635	0.759932	0.757894	0.782926	0.769499
C16	0.758249	0.686673	0.654551	0.581804	0.515953	0.647644	0.692537	0.815449	0.618665	0.799088	0.636057	0.606975	0.483504	0.791716	0.501907	0	0.661042	0.654292	0.653676	0.630096	0.771761	0.732151	0.682769	0.613949	0.552815	0.945661	0.808058	0.682584	0.499138	0.811096	0.553404	0.637477	0.492232	0.628099	0.771775	0.631974	0.538866	0.652396	0.621975	0.647678	0.77199	0.765616	0.780088	0.741893
C17	0.821561	0.824381	0.675651	0.663342	0.64698	0.537763	0.791621	0.734316	0.721909	0.810701	0.675655	0.674792	0.734007	0.702838	0.723254	0.661042	0	0.596531	0.666704	0.491658	0.872121	0.775152	0.727492	0.744735	0.739355	0.95857	0.763822	0.787618	0.631931	0.861776	0.607997	0.678891	0.639123	0.633475	0.842533	0.718814	0.65134	0.668802	0.692769	0.574361	0.780324	0.827505	0.837916	0.79773
C18	0.672598	0.835514	0.643045	0.736471	0.574775	0.56691	0.857461	0.620438	0.687618	0.862384	0.581572	0.691294	0.736241	0.653691	0.744963	0.654292	0.596531	0	0.610922	0.598288	0.842597	0.776896	0.684837	0.738998	0.649931	0.908363	0.794849	0.784602	0.614797	0.85851	0.713447	0.652424	0.585419	0.508636	0.864904	0.79158	0.576357	0.590528	0.683824	0.561541	0.83065	0.850474	0.857778	0.83351
C19	0.706084	0.806701	0.679837	0.713735	0.600674	0.641618	0.812122	0.711103	0.67444	0.876426	0.62475	0.525856	0.708648	0.742971	0.724392	0.653676	0.666704	0.610922	0	0.657752	0.848155	0.695571	0.79271	0.709146	0.696378	0.937828	0.756378	0.768249	0.649868	0.835134	0.682173	0.708574	0.556505	0.606925	0.848209	0.663976	0.622773	0.656935	0.636355	0.499363	0.829223	0.838651	0.856985	0.836669
C20	0.797446	0.7573	0.642389	0.600981	0.61557	0.531604	0.764826	0.753562	0.650574	0.787939	0.632938	0.684605	0.68331	0.702775	0.691807	0.630096	0.491658	0.598288	0.657752	0	0.827881	0.772164	0.695563	0.704734	0.699873	0.936543	0.746634	0.750238	0.598502	0.851589	0.666543	0.64708	0.594529	0.618421	0.833171	0.670846	0.631175	0.631721	0.666597	0.601872	0.767281	0.79892	0.844549	0.777658
C21	0.844515	0.787033	0.735657	0.77653	0.775077	0.827216	0.809576	0.901328	0.750911	0.881906	0.847576	0.818748	0.757645	0.90566	0.766385	0.771761	0.872121	0.842597	0.848155	0.827881	0	0.838675	0.803612	0.728977	0.612813	0.952282	0.905888	0.797816	0.785536	0.855355	0.791546	0.794921	0.789483	0.8656	0.834178	0.768051	0.78857	0.814146	0.795286	0.883562	0.852349	0.784182	0.880813	0.852979
C22	0.801999	0.826786	0.536105	0.769179	0.736116	0.757827	0.565193	0.853391	0.723475	0.890972	0.773271	0.686247	0.744252	0.843007	0.751343	0.732151	0.775152	0.776896	0.695571	0.772164	0.838675	0	0.848143	0.744743	0.745181	0.956584	0.850152	0.789966	0.725539	0.533563	0.724232	0.758703	0.705065	0.740538	0.500227	0.743682	0.734562	0.783336	0.718819	0.753601	0.581071	0.574167	0.5412	0.42843
S01.M0	0.763378	0.734797	0.778986	0.665859	0.637757	0.731518	0.772071	0.908495	0.697161	0.741211	0.61434	0.77686	0.672415	0.783581	0.676132	0.682769	0.727492	0.684837	0.79271	0.695563	0.803612	0.848143	0	0.650651	0.714376	0.849549	0.849851	0.750697	0.660259	0.859049	0.688784	0.574371	0.663838	0.623574	0.865142	0.742084	0.643634	0.627721	0.629527	0.748856	0.83952	0.826967	0.836816	0.855055
S02.M0	0.762314	0.577893	0.770587	0.592368	0.594808	0.728966	0.681453	0.873643	0.636013	0.746216	0.729007	0.672774	0.636115	0.821295	0.60884	0.613949	0.744735	0.738998	0.709146	0.704734	0.728977	0.744743	0.650651	0	0.641096	0.931308	0.815161	0.607536	0.59292	0.805392	0.626616	0.683285	0.621357	0.715105	0.78901	0.572727	0.686363	0.696391	0.620465	0.77675	0.789574	0.73313	0.821689	0.80103
S03.M0	0.680189	0.715845	0.613214	0.635103	0.536685	0.683676	0.749901	0.823106	0.640043	0.843431	0.650344	0.645162	0.550732	0.774911	0.576805	0.552815	0.739355	0.649931	0.696378	0.699873	0.612813	0.745181	0.714376	0.641096	0	0.931489	0.802232	0.704133	0.513159	0.819258	0.572884	0.648981	0.543929	0.634146	0.800398	0.667902	0.540476	0.683258	0.64962	0.719476	0.799387	0.723775	0.804135	0.773554
S04.M0	0.891902	0.952296	0.949754	0.948646	0.914751	0.910743	0.966262	0.938314	0.798404	0.715951	0.907592	0.93266	0.940468	0.916807	0.950749	0.945661	0.95857	0.908363	0.937828	0.936543	0.952282	0.956584	0.849549	0.931308	0.931489	0	0.926076	0.948721	0.924856	0.955491	0.945107	0.896341	0.927009	0.920356	0.969062	0.948232	0.917597	0.909913	0.934012	0.934775	0.966322	0.958131	0.967228	0.966324
S05.M0	0.70829	0.842982	0.827347	0.704644	0.783089	0.720428	0.856062	0.727406	0.724501	0.859334	0.731395	0.581322	0.840369	0.772638	0.83735	0.808058	0.763822	0.794849	0.756378	0.746634	0.905888	0.850152	0.849851	0.815161	0.802232	0.926076	0	0.862788	0.760209	0.883677	0.78973	0.800128	0.770171	0.795009	0.898535	0.72723	0.81087	0.768918	0.826093	0.79048	0.862289	0.824624	0.893266	0.844225
S06.M0	0.770367	0.663116	0.773382	0.664078	0.670767	0.763743	0.705749	0.891405	0.69466	0.773429	0.716405	0.733874	0.709013	0.79403	0.679658	0.682584	0.787618	0.784602	0.768249	0.750238	0.797816	0.789966	0.750697	0.607536	0.704133	0.948721	0.862788	0	0.647631	0.794529	0.665266	0.701636	0.690836	0.724065	0.815675	0.648459	0.70442	0.74416	0.676635	0.76996	0.778518	0.753489	0.797625	0.814173
S07.M0	0.674521	0.645412	0.69044	0.580347	0.473235	0.608393	0.726908	0.807452	0.615822	0.786039	0.599676	0.584004	0.554417	0.718588	0.561704	0.499138	0.631931	0.614797	0.649868	0.598502	0.785536	0.725539	0.660259	0.59292	0.513159	0.924856	0.760209	0.647631	0	0.801485	0.520452	0.615742	0.507039	0.569258	0.796274	0.626826	0.528198	0.607587	0.604358	0.663698	0.750483	0.747368	0.792375	0.771035
S08.M0	0.879971	0.846892	0.635126	0.816786	0.807934	0.823774	0.520163	0.915194	0.804666	0.890055	0.809379	0.800983	0.810794	0.905797	0.800915	0.811096	0.861776	0.85851	0.835134	0.851589	0.855355	0.533563	0.859049	0.805392	0.819258	0.955491	0.883677	0.794529	0.801485	0	0.820389	0.853362	0.776203	0.844278	0.522237	0.789729	0.823733	0.859975	0.825171	0.851273	0.469287	0.470323	0.414923	0.488847
S09.M0	0.764456	0.681709	0.690413	0.578743	0.576542	0.685805	0.700237	0.837097	0.62387	0.806908	0.648487	0.627298	0.572604	0.801758	0.58479	0.553404	0.607997	0.713447	0.682173	0.666543	0.791546	0.724232	0.688784	0.626616	0.572884	0.945107	0.78973	0.665266	0.520452	0.820389	0	0.621802	0.572125	0.637761	0.788465	0.620356	0.579029	0.63925	0.605659	0.670165	0.770179	0.753995	0.820638	0.784458
S10.M0	0.679439	0.767892	0.652878	0.629433	0.57995	0.63831	0.797763	0.790287	0.696846	0.832561	0.554584	0.682048	0.621934	0.669356	0.645016	0.637477	0.678891	0.652424	0.708574	0.64708	0.794921	0.758703	0.574371	0.683285	0.648981	0.896341	0.800128	0.701636	0.615742	0.853362	0.621802	0	0.634122	0.533662	0.829997	0.713857	0.508608	0.513122	0.55595	0.624598	0.782955	0.797719	0.822823	0.80894
S11.M0	0.664074	0.682398	0.671873	0.604665	0.489386	0.638293	0.640799	0.790251	0.608354	0.780201	0.626771	0.542812	0.576504	0.776222	0.606996	0.492232	0.639123	0.585419	0.556505	0.594529	0.789483	0.705065	0.663838	0.621357	0.543929	0.927009	0.770171	0.690836	0.507039	0.776203	0.572125	0.634122	0	0.578204	0.77505	0.570539	0.517925	0.636557	0.591425	0.571416	0.751829	0.703922	0.769835	0.761746
S12.M0	0.670379	0.824323	0.616569	0.656091	0.502996	0.627621	0.817468	0.742668	0.690908	0.881033	0.505158	0.659352	0.661161	0.665544	0.682008	0.628099	0.633475	0.508636	0.606925	0.618421	0.8656	0.740538	0.623574	0.715105	0.634146	0.920356	0.795009	0.724065	0.569258	0.844278	0.637761	0.533662	0.578204	0	0.840633	0.773752	0.476238	0.538439	0.598459	0.557433	0.796201	0.839014	0.81828	0.801363
S13.M0	0.890304	0.830685	0.63656	0.792535	0.799687	0.841734	0.56341	0.931496	0.798075	0.88311	0.85891	0.814771	0.798304	0.915929	0.764789	0.771775	0.842533	0.864904	0.848209	0.833171	0.834178	0.500227	0.865142	0.78901	0.800398	0.969062	0.898535	0.815675	0.796274	0.522237	0.788465	0.829997	0.77505	0.840633	0	0.762996	0.798608	0.849203	0.831548	0.872533	0.533863	0.572687	0.50957	0.490561
S14.M0	0.718065	0.643634	0.789694	0.524387	0.671659	0.724948	0.612634	0.818162	0.60291	0.779411	0.789334	0.504327	0.652581	0.8538	0.64486	0.631974	0.718814	0.79158	0.663976	0.670846	0.768051	0.743682	0.742084	0.572727	0.667902	0.948232	0.72723	0.648459	0.626826	0.789729	0.620356	0.713857	0.570539	0.773752	0.762996	0	0.695417	0.751663	0.677115	0.703479	0.769545	0.684528	0.812547	0.795217
S15.M0	0.692958	0.762645	0.655801	0.657513	0.456142	0.631981	0.797601	0.778652	0.655067	0.845783	0.559061	0.606131	0.568234	0.70685	0.597741	0.538866	0.65134	0.576357	0.622773	0.631175	0.78857	0.734562	0.643634	0.686363	0.540476	0.917597	0.81087	0.70442	0.528198	0.823733	0.579029	0.508608	0.517925	0.476238	0.798608	0.695417	0	0.558875	0.594775	0.548969	0.78777	0.80149	0.794133	0.790102
S16.M0	0.755851	0.765232	0.630864	0.642807	0.572488	0.622992	0.824665	0.714781	0.674275	0.855188	0.48753	0.698007	0.669343	0.52818	0.692904	0.652396	0.668802	0.590528	0.656935	0.631721	0.814146	0.783336	0.627721	0.696391	0.683258	0.909913	0.768918	0.74416	0.607587	0.859975	0.63925	0.513122	0.636557	0.538439	0.849203	0.751663	0.558875	0	0.616672	0.602982	0.832288	0.83255	0.85739	0.841441
S17.M0	0.747677	0.731102	0.696053	0.624381	0.583548	0.699335	0.736021	0.844588	0.659147	0.839914	0.609801	0.633065	0.639102	0.738813	0.608441	0.621975	0.692769	0.683824	0.636355	0.666597	0.795286	0.718819	0.629527	0.620465	0.64962	0.934012	0.826093	0.676635	0.604358	0.825171	0.605659	0.55595	0.591425	0.598459	0.831548	0.677115	0.594775	0.616672	0	0.614023	0.792732	0.791194	0.825664	0.814038
S18.M0	0.754447	0.848223	0.650775	0.734605	0.594403	0.576413	0.819089	0.674035	0.725217	0.903738	0.570975	0.570612	0.668441	0.672716	0.709635	0.647678	0.574361	0.561541	0.499363	0.601872	0.883562	0.753601	0.748856	0.77675	0.719476	0.934775	0.79048	0.76996	0.663698	0.851273	0.670165	0.624598	0.571416	0.557433	0.872533	0.703479	0.548969	0.602982	0.614023	0	0.839901	0.844644	0.83308	0.837421
S19.M0	0.865275	0.830476	0.613277	0.763647	0.789334	0.774708	0.530047	0.918248	0.80522	0.85935	0.786478	0.807117	0.789498	0.889033	0.759932	0.77199	0.780324	0.83065	0.829223	0.767281	0.852349	0.581071	0.83952	0.789574	0.799387	0.966322	0.862289	0.778518	0.750483	0.469287	0.770179	0.782955	0.751829	0.796201	0.533863	0.769545	0.78777	0.832288	0.792732	0.839901	0	0.504902	0.425116	0.535201
S20.M0	0.822971	0.761992	0.629679	0.737741	0.776164	0.765954	0.463141	0.896818	0.730537	0.850857	0.822903	0.731849	0.738634	0.91619	0.757894	0.765616	0.827505	0.850474	0.838651	0.79892	0.784182	0.574167	0.826967	0.73313	0.723775	0.958131	0.824624	0.753489	0.747368	0.470323	0.753995	0.797719	0.703922	0.839014	0.572687	0.684528	0.80149	0.83255	0.791194	0.844644	0.504902	0	0.501766	0.54345
S21.M0	0.877235	0.871436	0.627119	0.815922	0.803388	0.836707	0.528383	0.923349	0.852289	0.917421	0.800146	0.807061	0.795952	0.898042	0.782926	0.780088	0.837916	0.857778	0.856985	0.844549	0.880813	0.5412	0.836816	0.821689	0.804135	0.967228	0.893266	0.797625	0.792375	0.414923	0.820638	0.822823	0.769835	0.81828	0.50957	0.812547	0.794133	0.85739	0.825664	0.83308	0.425116	0.501766	0	0.470795
S22.M0	0.870997	0.849329	0.576229	0.790211	0.787076	0.796623	0.589251	0.902079	0.792441	0.867504	0.83999	0.786387	0.766856	0.887796	0.769499	0.741893	0.79773	0.83351	0.836669	0.777658	0.852979	0.42843	0.855055	0.80103	0.773554	0.966324	0.844225	0.814173	0.771035	0.488847	0.784458	0.80894	0.761746	0.801363	0.490561	0.795217	0.790102	0.841441	0.814038	0.837421	0.535201	0.54345	0.470795	0

## Sheet: Table S10
Table S10 The dominant phyla of HC and RA samples
	C20	C06	C21	C17	C02	C14	C15	C09	C04	C10	C11	C19	C16	C07	C13	C03	C18	C05	C22	C08	C01	C12	S01.M0	S02.M0	S05.M0	S14.M0	S06.M0	S03.M0	S13.M0	S11.M0	S20.M0	S10.M0	S18.M0	S09.M0	S07.M0	S08.M0	S17.M0	S16.M0	S19.M0	S22.M0	S15.M0	S12.M0	S04.M0	S21.M0
p__Bacteroidetes	36.3662	40.4541	40.9149	46.4602	48.4486	54.6704	61.7132	61.8991	61.9882	62.8562	65.6146	70.7309	72.5731	72.9952	75.1167	78.653	80.7056	81.9497	83.6395	83.7033	85.4816	85.8434	51.9469	55.9304	62.5046	62.9664	65.8261	66.3854	68.8835	69.5813	70.2045	71.2123	73.9594	75.4241	75.6329	75.7534	76.503	76.9511	81.6612	82.9974	87.0853	88.4207	91.2305	92.4955
p__Firmicutes	44.7459	44.8433	19.3959	47.2227	44.836	22.2323	34.309	31.8034	32.0346	26.8781	16.8009	19.2267	25.1349	24.3974	18.8861	5.9247	8.74541	13.5726	14.5744	4.80146	7.0428	11.7847	42.5546	30.0346	14.8482	29.0279	29.4714	12.707	24.3374	23.6432	16.5593	19.9812	13.5224	22.0533	21.7865	11.7522	17.9845	16.8211	16.2356	10.705	8.4351	7.33759	5.99494	3.94121
p__Proteobacteria	1.71456	12.8901	36.4814	2.16775	2.55414	2.3412	2.78398	3.5559	3.02417	2.69718	2.45301	2.72702	1.73617	2.11584	5.44363	15.1736	3.00454	3.66976	0.90156	11.3383	5.22103	0.69634	3.79532	4.60303	11.2893	1.34412	2.17524	20.3599	5.59972	3.27377	12.0587	8.51916	1.20882	2.13311	0.81808	12.3178	3.25819	5.8025	1.55281	4.27908	4.21282	2.12366	2.15412	3.43127
p__Actinobacteria	13.8196	1.66081	1.7812	1.7831	3.86843	0.33926	0.98426	2.49827	2.94265	1.30192	0.08597	1.9199	0.24022	0.48041	0.4931	0.19674	0.39652	0.79737	0.18553	0.13776	0.81251	1.05264	1.07631	9.40833	8.80679	3.92525	0.39194	0.27315	0.9756	0.45526	1.15358	0.26882	0.25355	0.38062	1.73612	0.15128	1.8874	0.3993	0.53802	1.39132	0.2551	1.38855	0.60222	0.12123
p__Fusobacteria	3.28067	0.14376	0.01988	2.35183	0.00197	1.93071	0.0324	0.03656	0.00182	0.03117	15.0261	5.38022	0.02968	0.00455	0.03095	0.01149	7.13389	0.00887	0.66673	0.00366	1.43973	0.60522	0.52716	0.00066	2.55103	0.01009	0.00065	0.23163	0.02663	3.03542	0.01219	0.01767	11.0547	0.00645	0.02422	0.00142	0.35612	0.01866	0.0122	0.6256	0.0076	0.71937	0.00569	0.00925
Others	0.07297	0.00792	1.40675	0.01445	0.29086	18.4861	0.17715	0.2068	0.00849	6.23549	0.01948	0.01524	0.28592	0.00652	0.02948	0.04045	0.01406	0.00168	0.03238	0.01553	0.00236	0.01773	0.09968	0.02302	0.00011	2.72623	2.13476	0.04303	0.17717	0.01105	0.01166	0.00088	0.0012	0.00243	0.00217	0.02399	0.01084	0.00732	0.00013	0.00162	0.00409	0.01008	0.01257	0.00154

[truncated: 4 more sheets: Table S11, Table S12, Table S13, Table S14]
